# Supplementary material for: Accurate and precise quantification of atmospheric nitrate in streams draining land of various uses by using triple oxygen isotopes as tracers
Source: Copernicus journal article supplement (doi:10.5194/bg-2015-627), 2016-01-18
Supplement: Supplementary file 1 [file bg-2015-627-supplement.pdf]

1 *Supplement of*

2 **Accurate and precise quantification of atmospheric nitrate**  
3 **in streams draining land of various uses by using triple**  
4 **oxygen isotopes as tracers**

5 **Ururu Tsunogai et al.**

6

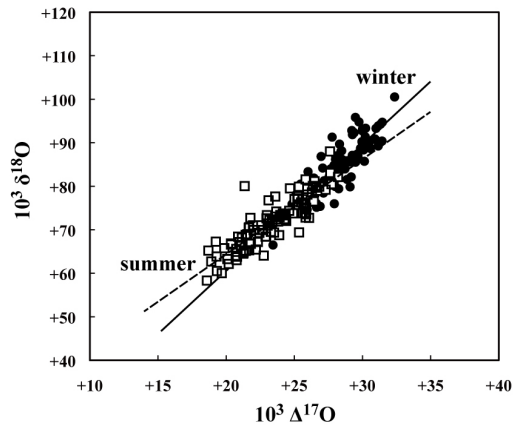

7  
8

9 Figure S1. Relationship between  $\Delta^{17}\text{O}$  and  $\delta^{18}\text{O}$  for atmospheric nitrate in wet deposition. The  
10 black circles represent those in winter, from November to March, whereas the white squares  
11 represent those in summer, from April to October. The solid and dashed lines represent the  
12 least-squares fitted lines to the data of winter and summer, respectively.

13

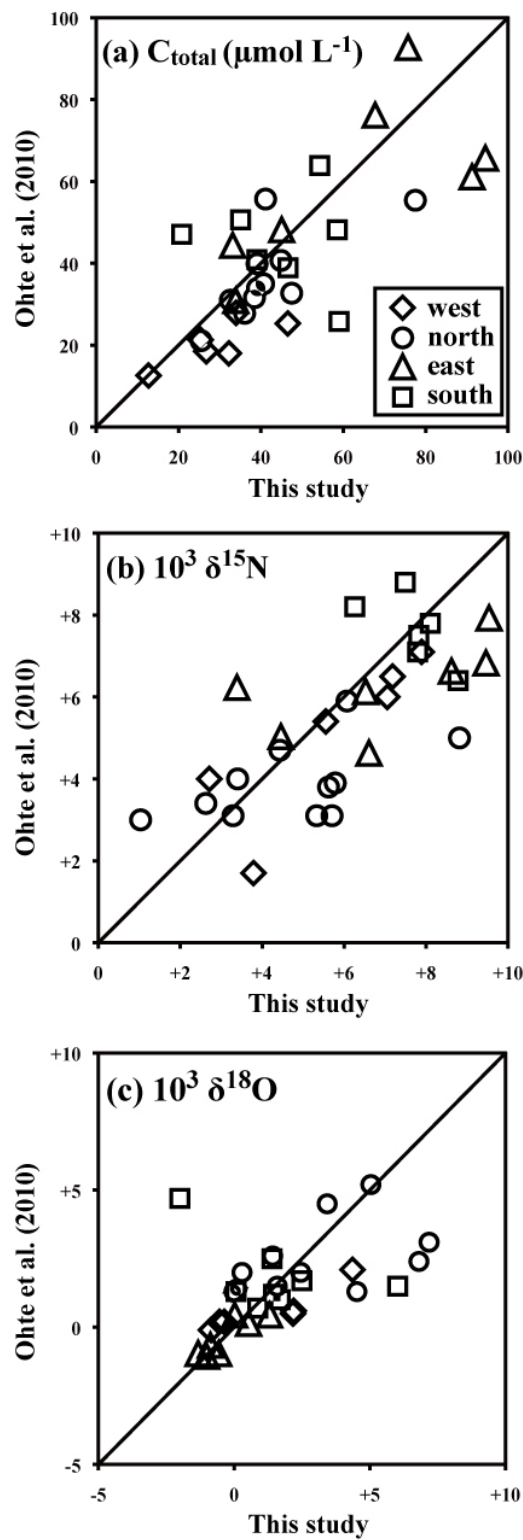

1  
 2 Figure S2. Comparison of the (a) annual average concentration, (b)  $\delta^{15}\text{N}$ , and (c)  $\delta^{18}\text{O}$  for  
 3 nitrate in each inflow stream with the values obtained in this study and those reported in Ohte  
 4 et al. (2010). The symbols represent the location of each river (west: diamonds; north: circles;  
 5 east: triangles; south: squares).
