# Supplementary material for: Accurate and precise quantification of atmospheric nitrate in streams draining land of various uses by using triple oxygen isotopes as tracers
Source: Copernicus journal article supplement (doi:10.5194/bg-2015-627), 2016-01-18
Supplement: Supplementary file [file bg-2015-627-RC2-supplement.pdf]

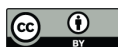

# Accurate and precise quantification of atmospheric nitrate in streams draining land of various uses by using triple oxygen isotopes as tracers

Urumu Tsunogai<sup>1</sup>, Takanori Miyauchi<sup>1</sup>, Takuya Ohyama<sup>1</sup>, Daisuke D. Komatsu<sup>1,\*</sup>,  
Fumiko Nakagawa<sup>1</sup>, Yusuke Obata<sup>2</sup>, Keiichi Sato<sup>3</sup>, and Tsuyoshi Ohizumi<sup>3</sup>

[1]{Graduate School of Environmental Studies, Nagoya University, Furo-cho, Chikusa-ku,  
Nagoya 464-8601, Japan}

[2]{Faculty of Bioresources, Mie University, 1577 Kurimamachiya-cho, Tsu 514-8507,  
Japan}

[3]{Asia Center for Air Pollution Research, 1182 Sowa Nishi-ku, Niigata 950-2144, Japan}

[\*]{now at School of Marine Science and Technology, Tokai University, 3-20-1 Orito,  
Shimizu, Shizuoka 424-8610, Japan}

Correspondence to: U. Tsunogai (urumu@nagoya-u.jp)

## Abstract

<sup>17</sup>O anomalies were used to quantify the influence of changes in land use and population density between each catchment area on the fate of atmospheric nitrate by determining the areal distribution and seasonal variation in stable isotopic compositions including the <sup>17</sup>O anomalies ( $\Delta^{17}\text{O}$ ) of nitrate for more than 30 streams within the same watershed. Those in precipitation (wet deposition;  $n = 213$ ) sampled at Sado-seki monitoring station were determined for three years as well. The deposited nitrate showed similar large <sup>17</sup>O anomalies with those already reported for mid-latitudes:  $\Delta^{17}\text{O}$  values ranged from +18.6‰ to +32.4‰ with a three-year average of +26.3‰. However, nitrate in each inflow stream showed small annual average  $\Delta^{17}\text{O}$  values ranging from +0.5‰ to +3.1‰, which corresponds to the mixing ratios of unprocessed atmospheric nitrate to total nitrate from  $1.8 \pm 0.3\%$  to  $11.8 \pm 1.8\%$ , with  $5.1 \pm 0.5\%$  as the average of all inflow streams. Although the annual average  $\Delta^{17}\text{O}$  values



1 tended to be smaller in accordance with the increase in annual average nitrate concentration  
 2 from 12.7 to 106.2  $\mu\text{mol L}^{-1}$ , the absolute concentrations of unprocessed atmospheric nitrate  
 3 in the streams were almost stable at  $2.3 \pm 1.1 \mu\text{mol L}^{-1}$  irrespective of the changes in  
 4 population density and land use in each catchment area. We conclude that changes in  
 5 population density and land use between each catchment area had little impact on the  
 6 concentration of atmospheric nitrate. Thus, the total nitrate concentration originated primarily  
 7 from additional contribution of remineralized nitrate from both natural sources, having values  
 8 of  $+4.4 \pm 1.8\text{‰}$  and  $-2.3 \pm 0.9\text{‰}$  for  $\delta^{15}\text{N}$  and  $\delta^{18}\text{O}$ , respectively, and anthropogenic sources  
 9 having values of  $+9.2 \pm 1.3\text{‰}$  and  $-2.2 \pm 1.1\text{‰}$  for  $\delta^{15}\text{N}$  and  $\delta^{18}\text{O}$ , respectively. In addition,  
 10 both the uniform absolute concentration of atmospheric nitrate and the low and uniform  $\delta^{18}\text{O}$   
 11 values of the remineralized portion of nitrate in the streams imply that in-stream removal of  
 12 nitrate through assimilation or denitrification had small impact on the concentrations and  
 13 stable isotopic compositions of nitrate in the streams, except for a few streams in summer  
 14 having catchments of urban/suburban land uses. Additional measurements of the  $\Delta^{17}\text{O}$  values  
 15 of nitrate together with  $\delta^{15}\text{N}$  and  $\delta^{18}\text{O}$  enabled us to exclude the contribution of unprocessed  
 16 atmospheric nitrate from the determined  $\delta^{15}\text{N}$  and  $\delta^{18}\text{O}$  values of total nitrate and to use the  
 17 corrected  $\delta^{15}\text{N}$  and  $\delta^{18}\text{O}$  values to evaluate the source and behaviour of the remineralized  
 18 portion of nitrate in each stream.

19

## 20 1 Introduction

21 Nitrate ( $\text{NO}_3^-$ ) in stream water can be an important **clue** for understanding the biogeochemical  
 22 cycles within **its** catchment area (Durka et al. 1994; Likens et al. 1970; Swank et al. 2001). In  
 23 addition, the nitrate concentration in stream water is important to primary production and thus  
 24 eutrophication downstream, including lakes, estuaries, and oceans (Mcisaac et al. 2001; Paerl  
 25 2009). Nitrate concentrations in stream water, however, are determined through a complicated  
 26 interplay of several processes within its catchment area including (1) the addition of  
 27 atmospheric nitrate ( $\text{NO}_3^-_{\text{atm}}$ ) through deposition, (2) the production of remineralized nitrate  
 28 ( $\text{NO}_3^-_{\text{re}}$ ) through microbial nitrification, and (3) the removal of nitrate through assimilation  
 29 and denitrification by plants and microbes. In addition to natural processes, anthropogenic  
 30 processes could have a significant impact on the nitrate dynamics within each catchment area,  
 31 particularly for those eluted from urban or agricultural catchment zones. Therefore,



1 interpretation of the processes regulating nitrate concentration in stream water is not always  
2 straightforward.

3 The  $^{15}\text{N}/^{14}\text{N}$  and  $^{18}\text{O}/^{16}\text{O}$  ratios of nitrate have been widely applied in the determination of the  
4 sources and behaviours of nitrate in stream water worldwide (Barnes et al. 2008; Barnes and  
5 Raymond 2010; Burns et al. 2009; Burns and Kendall 2002; Campbell et al. 2002; Campbell  
6 et al. 2006; Costa et al. 2011; Curtis et al. 2011; Durka et al. 1994; Hales et al. 2007;  
7 Johannsen et al. 2008; Kaushal et al. 2011; Lohse et al. 2013; Mayer et al. 2002; Nestler et al.  
8 2011; Ohte 2013; Ohte et al. 2004; Ohte et al. 2010; Pellerin et al. 2012; Silva et al. 2002;  
9 Thibodeau et al. 2013; Tobari et al. 2010; Wankel et al. 2006; Williard et al. 2001; Yue et al.  
10 2013; Zeng and Wu 2015). By combining the two isotopic ratios, the relative mixing ratios  
11 among various nitrate sources such as atmospheric (unprocessed), fertilizer, manure, and  
12 sewage plants can be quantified through a simple isotope mass balance approach. Partial  
13 removal of nitrate through either assimilation or denitrification, however, results in residual  
14 nitrate being enriched with  $^{15}\text{N}$  and  $^{18}\text{O}$  (Böttcher et al. 1990; Granger et al. 2010), which  
15 complicates their interpretation beyond that of the simple isotope mass balance approach. In  
16 addition, trace contributions of unprocessed  $\text{NO}_3^-_{\text{atm}}$  could have a significant impact on the  
17  $^{18}\text{O}/^{16}\text{O}$  ratios of the total nitrate in stream water (Durka et al. 1994; Kendall 1998; Mayer et  
18 al. 2001; Michalski et al. 2004; Tsunogai et al. 2010). Therefore,  $^{18}\text{O}/^{16}\text{O}$  ratios are used as  
19 tracers based on assumptions such as (1) the  $^{18}\text{O}/^{16}\text{O}$  ratios of nitrate in stream water simply  
20 reflect the mixing ratio of unprocessed  $\text{NO}_3^-_{\text{atm}}$  within total nitrate (Barnes et al. 2008; Burns  
21 et al. 2009; Campbell et al. 2006; Durka et al. 1994; Ohte et al. 2004; Ohte et al. 2010; Zeng  
22 and Wu 2015), and (2) the mixing ratios of unprocessed  $\text{NO}_3^-_{\text{atm}}$  within total nitrate are  
23 minimum or uniform for whole or specific stream water samples (Johannsen et al. 2008;  
24 Mayer et al. 2002; Wankel et al. 2006). To verify the reliability of these assumptions and to  
25 utilize the  $^{18}\text{O}/^{16}\text{O}$  ratios for the quantification of the accurate and precise mixing ratios  
26 among various nitrate sources based on the isotope mass balance approach, the mixing ratio  
27 of  $\text{NO}_3^-_{\text{atm}}$  within the total nitrate in stream water must be better understood; otherwise, the  
28 processes regulating nitrate concentration in stream water will be ambiguous even when  
29 adding the data of  $^{18}\text{O}/^{16}\text{O}$  ratios of nitrate.

30 To overcome the limitation in using the  $^{15}\text{N}/^{14}\text{N}$  and  $^{18}\text{O}/^{16}\text{O}$  ratios, the  $^{17}\text{O}/^{16}\text{O}$  ratios of  
31 nitrate have been used as an additional tracer of  $\text{NO}_3^-_{\text{atm}}$  in stream water in recent studies  
32 (Dejwakh et al. 2012; Michalski et al. 2004; Riha et al. 2014; Rose et al. 2015; Tsunogai et al.



2010; Tsunogai et al. 2014). The  $^{17}\text{O}/^{16}\text{O}$  ratios were used because, whereas  $\text{NO}_3^-_{\text{re}}$ , the oxygen atoms of which are derived from either terrestrial  $\text{O}_2$  or  $\text{H}_2\text{O}$  through nitrification, shows mass-dependent relative variations between  $^{17}\text{O}/^{16}\text{O}$  and  $^{18}\text{O}/^{16}\text{O}$  ratios, unprocessed  $\text{NO}_3^-_{\text{atm}}$  displays an anomalous enrichment in  $^{17}\text{O}$  from the mass-dependent relative variations, reflecting oxygen atom transfers from ozone during the conversion of  $\text{NO}_x$  to  $\text{NO}_3^-_{\text{atm}}$  (Michalski et al. 2003; Morin et al. 2008). By using the  $\Delta^{17}\text{O}$  signature defined by the following equation (Kaiser et al. 2007; Miller 2002), we can distinguish  $\text{NO}_3^-_{\text{atm}}$  ( $\Delta^{17}\text{O} > 0$ ) from  $\text{NO}_3^-_{\text{re}}$  ( $\Delta^{17}\text{O} = 0$ ):

$$\Delta^{17}\text{O} = \frac{1 + \delta^{17}\text{O}}{(1 + \delta^{18}\text{O})^\beta} - 1, \quad (1)$$

where the constant  $\beta$  is 0.5247 (Kaiser et al. 2007; Miller 2002),  $\delta^{18}\text{O} = R_{\text{sample}}/R_{\text{standard}} - 1$ , and  $R$  is the  $^{18}\text{O}/^{16}\text{O}$  ratio of the sample (or the  $^{17}\text{O}/^{16}\text{O}$  ratio in the case of  $\delta^{17}\text{O}$  or the  $^{15}\text{N}/^{14}\text{N}$  ratio in the case of  $\delta^{15}\text{N}$ ) and each standard reference material. In addition,  $\Delta^{17}\text{O}$  is stable during the mass-dependent isotope fractionation processes within surface ecosystems. Therefore, although the atmospheric  $\delta^{15}\text{N}$  or  $\delta^{18}\text{O}$  signature can be overprinted by biogeochemical processes subsequent to deposition,  $\Delta^{17}\text{O}$  can be used as a robust tracer of unprocessed  $\text{NO}_3^-_{\text{atm}}$  to reflect the mixing ratio of unprocessed  $\text{NO}_3^-_{\text{atm}}$  within total  $\text{NO}_3^-$  regardless of biogeochemical removal processes subsequent to deposition by using the following equation:

$$\frac{C_{\text{atm}}}{C_{\text{total}}} = \frac{\Delta^{17}\text{O}}{\Delta^{17}\text{O}_{\text{atm}}}, \quad (2)$$

where  $C_{\text{atm}}$  and  $C_{\text{total}}$  denote the concentration of  $\text{NO}_3^-_{\text{atm}}$  and  $\text{NO}_3^-$  in each water sample, respectively, and  $\Delta^{17}\text{O}_{\text{atm}}$  and  $\Delta^{17}\text{O}$  denote the  $\Delta^{17}\text{O}$  values of  $\text{NO}_3^-_{\text{atm}}$  and nitrate (total) in each water sample, respectively.

Moreover, additional measurements of the  $\Delta^{17}\text{O}$  values of nitrate together with  $\delta^{15}\text{N}$  and  $\delta^{18}\text{O}$  enable us to exclude the contribution of  $\text{NO}_3^-_{\text{atm}}$  in the determined  $\delta^{15}\text{N}$  and  $\delta^{18}\text{O}$  values and to estimate the corrected  $\delta^{15}\text{N}$  and  $\delta^{18}\text{O}$  values ( $\delta^{15}\text{N}_{\text{re}}$  and  $\delta^{18}\text{O}_{\text{re}}$ , respectively) for accurate evaluation on the source and behaviour of  $\text{NO}_3^-_{\text{re}}$  (Dejwakh et al. 2012; Liu et al. 2013; Riha et al. 2014; Tsunogai et al. 2011; Tsunogai et al. 2010; Tsunogai et al. 2014).

Previous studies have successfully applied the  $\Delta^{17}\text{O}$  tracer of nitrate to those eluted from arid/semi-arid watersheds (Dejwakh et al. 2012; Michalski et al. 2004; Riha et al. 2014),



1 forested watersheds (Rose et al. 2015; Tsunogai et al. 2010; Tsunogai et al. 2014), and a large  
2 river basin (Liu et al. 2013) to determine the accurate and precise mixing ratios of  
3 unprocessed  $\text{NO}_3^-_{\text{atm}}$  in total nitrate in addition to the fate of the  $\text{NO}_3^-_{\text{atm}}$  that had been  
4 deposited into each watershed. However, relative changes in the source and fate of  $\text{NO}_3^-_{\text{atm}}$  in  
5 accordance with the changes in land use of catchments have not been studied thus far by using  
6 the  $\Delta^{17}\text{O}$  tracer of nitrate.

7 In this study, we measure the concentrations and the stable isotopic compositions of nitrate  
8 including  $\Delta^{17}\text{O}$  values for more than 30 streams flowing into a lake in Japan with catchments  
9 of widely varying land uses within the same watershed, which includes urban, suburban,  
10 agricultural (mostly rice paddies), and forested catchments. By using the  $\Delta^{17}\text{O}$  tracer, we  
11 quantify both areal and temporal variations in the concentrations of both  $\text{NO}_3^-_{\text{atm}}$  and  $\text{NO}_3^-_{\text{re}}$   
12 in streams across the land use settings to gain insight into the processes controlling the source,  
13 transport, and fate of  $\text{NO}_3^-_{\text{atm}}$  and  $\text{NO}_3^-_{\text{re}}$  (Fig. 1). Although  $\text{NO}_3^-_{\text{re}}$  increases during  
14 nitrification within each catchment area, ~~for instance,~~  $\text{NO}_3^-_{\text{atm}}$  is stable, so that we can  
15 evaluate the progress of nitrification within each catchment area by using the changes in the  
16 concentrations of both  $\text{NO}_3^-_{\text{atm}}$  and  $\text{NO}_3^-_{\text{re}}$ . Besides ~~to the streams,~~ we determine those values  
17 in precipitation (wet deposition) for comparison to obtain accurate and precise mixing ratios  
18 of both  $\text{NO}_3^-_{\text{atm}}$  and  $\text{NO}_3^-_{\text{re}}$  within nitrate (total) in each stream. Moreover, we exclude the  
19 contribution of  $\text{NO}_3^-_{\text{atm}}$  in the determined  $\delta^{15}\text{N}$  and  $\delta^{18}\text{O}$  values to estimate the corrected  $\delta^{15}\text{N}$   
20 and  $\delta^{18}\text{O}$  values for accurate evaluation of the source and behaviour of  $\text{NO}_3^-_{\text{re}}$ . Further, we  
21 determine those values in an outflow stream of the same lake to evaluate the influences of  
22 flow stagnation ~~into~~ the lake on nitrate by using the differences between inflows and outflows  
23 (Fig. 1). The results presented herein will increase our understanding of the fate of  $\text{NO}_3^-_{\text{atm}}$   
24 deposited onto land, particularly ~~those~~ deposited ~~onto~~ urban/suburban and forested  
25 catchments (Fig. 1).

26

## 27 2 Experimental Section

### 28 2.1 Site description

#### 29 2.1.1 Lake Biwa watershed basin



Lake Biwa, located in the central part of the Japanese Islands, is the largest freshwater lake in Japan (Fig. 2). It has a surface area of 670.4 km<sup>2</sup> and a total catchment area of 3174 km<sup>2</sup> with annual precipitation of around 2000 mm. More than 120 streams flow into the lake, whereas the Seta River (No. 33 in Fig. 2(b)) at the southern end, also known as the Yodo River, is the only natural outflow. The average residence time of water in the lake is 5.5 years.

Similar to many lakes throughout the world, Lake Biwa has experienced eutrophication in the past. Urbanization near the lake beginning in the 1960s, particularly on the southern and eastern shore, likely caused an increase in nutrient loading. Blooms of *Uroglena americana* and cyanobacteria have occurred since 1977 and 1983, respectively (Hsieh et al. 2011). To clarify the pathways and sources of nitrate that were fed into the lake, the stable isotopic compositions ( $\delta^{15}\text{N}$  and  $\delta^{18}\text{O}$ ) of dissolved nitrate were determined in the major streams flowing into the lake (Ohte et al. 2010). Based on the  $\delta^{15}\text{N}$  values of nitrate showing positive correlation with population densities of each catchment area, it was concluded that sewage effluent was the dominant source contributing to the increase in the  $\delta^{15}\text{N}$  values of nitrate.

### 2.1.2 Sado-seki monitoring station

Sado-seki National Acid Rain Monitoring Station (38°14'59"N, 138°24'00"E) was established on Sado Island (Fig. 2(a)), at 110 m above sea level, as a monitoring observatory of the Acid Deposition Monitoring Network in East Asia (EANET) representing the central Japan area (EANET 2014). The monitoring has shown that the observatory received 24.5 mmol NO<sub>3</sub><sup>-</sup> m<sup>-2</sup>yr<sup>-1</sup> and 17.1 mmol NH<sub>4</sub><sup>+</sup> m<sup>-2</sup>yr<sup>-1</sup> on average from FY2009 to 2011 (EANET 2014), which corresponds to a total fixed N deposition rate of 5.8 kg of N ha<sup>-1</sup>yr<sup>-1</sup>.

## 2.2 Sampling

Stream water samples were collected near the mouths of each stream during base flow periods four times in 2013 on March 15, June 17, August 5, and October 21 from 33 inflow streams and 1 outflow river (Seta River) of Lake Biwa (Table 1; Fig. 2(b)) except for stream Nos. 3 and 28 in June, which became dry arroyos at that time. The catchments of the studied inflow streams occupied 70% of the entire Lake Biwa basin area. The streams were selected to cover those in which the concentrations and stable isotope compositions of nitrate,  $\delta^{15}\text{N}$  and  $\delta^{18}\text{O}$ , had already been determined in 2004–2006 (Ohte et al. 2010). The categories of locations classified by Ohte et al. (2010) were also used in this study to classify the location of the

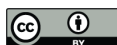

1 streams (Table 1). Either a bucket or dipper was used to collect samples as far from the bank  
2 as possible. Each sample was transferred into a dark polyethylene bottle that was pre-rinsed at  
3 least twice with the sample itself and stored ~~under refrigeration~~. Then, the samples were  
4 filtered through a pre-combusted Whatman GF/F filter with a 0.7  $\mu\text{m}$  pore size within a few  
5 hours after collection, and the filtrate was stored in a different dark polyethylene bottle ~~under~~  
6 ~~refrigeration~~ at 4°C until analysis.

7 To calculate the annual influx/efflux of nitrate via each stream to/from Lake Biwa as well as  
8 its seasonal variation, we used the sampling number  $n$ , where  $n = 1, 2, 3$ , and 4, ~~to represent~~  
9 the sampling in March, June, August, and October, respectively. In addition, we used one  
10 more hypothetical sampling number ( $n = 5$ ) set just one year later than the  $n = 1$  date to  
11 quantify the annual influx/efflux. Accordingly, we assumed that **secular change** was minimum  
12 in the streams and that the streams returned back to the initial state one year later.  
13 Furthermore, we rated the interval between  $n = 1$  and 2 as spring,  $n = 2$  and 3 as summer,  $n =$   
14 3 and 4 as autumn, and  $n = 4$  and 5 as winter for the streams in this study.

15 Samples of wet deposition were taken at the Sado-seki National Acid Rain Monitoring Station  
16 by using standard methods for evaluating acid deposition in Japan from April 2009 to March  
17 2012. An automatic wet deposition sampler (US-420, Ogasawara) was used in the collection.  
18 All of the deposition samples were ~~introduced and~~ stored in 1 L polyethylene bottles ~~under~~  
19 ~~refrigeration~~ until daily recovery. After measuring both the conductivity and pH, the  
20 recovered samples were filtered through a 0.2  $\mu\text{m}$  pore-size membrane filter (Dismic-25CS,  
21 ADVANTEC) and stored in a refrigerator until analysis. The annual wet deposition rate of  
22 nitrate was 19.3  $\text{mmol m}^{-2}\text{y}^{-1}$  for **FY2009**, from April 2009 to March 2010; 28.0  $\text{mmol m}^{-2}\text{y}^{-1}$   
23 for **FY2010**, from April 2010 to March 2011; and 27.0  $\text{mmol m}^{-2}\text{y}^{-1}$  for **FY2011**, from April  
24 2011 to March 2012 (EANET 2014).

### 25 **2.3 Analysis**

26 The concentrations of nitrate ( $\text{NO}_3^-$ ) and nitrite ( $\text{NO}_2^-$ ) in each filtrate sample were measured  
27 by ion chromatography (Prominence HIC-SP, Shimadzu, Japan) within a few days after each  
28 sampling. The  $\delta^{18}\text{O}$  values of  $\text{H}_2\text{O}$  in the samples were analysed by using the cavity ring-  
29 down spectroscopy method by employing the **Picarro L2120-I instrument** equipped with an  
30 A0211 vaporizer and auto sampler; the error in this method was  $\pm 0.1\%$ . Both Vienna



1 Standard Mean Ocean Water (VSMOW) and Standard Light Antarctic Precipitation (SLAP)  
2 were used to calibrate the values to the international scale.

3 To determine the stable isotopic compositions, nitrate in each filtrate sample was chemically  
4 converted to  $\text{N}_2\text{O}$  by using a method originally developed to determine the  $^{15}\text{N}/^{14}\text{N}$  and  
5  $^{18}\text{O}/^{16}\text{O}$  ratios of seawater and freshwater nitrate (Mcilvin and Altabet 2005) which was later  
6 modified (Konno et al. 2010; Nakagawa et al. 2013; Tsunogai et al. 2011; Tsunogai et al.  
7 2008; Tsunogai et al. 2010; Yamazaki et al. 2011). Then, the stable isotopic compositions of  
8  $\text{N}_2\text{O}$  were determined by using a continuous-flow isotope ratio mass spectrometry (CF-IRMS)  
9 system in Nagoya University (Hirota et al. 2010; Komatsu et al. 2008). The analytical  
10 procedures are the same as those detailed in previous research (Nakagawa et al. 2013;  
11 Tsunogai et al. 2014).

12 To determine whether samples were deteriorated or contaminated during storage and whether  
13 the conversion rate from nitrate to  $\text{N}_2\text{O}$  was sufficient, concentrations of nitrate in the samples  
14 were determined each time we analysed isotopic compositions using MS based on the  $\text{N}_2\text{O}^+$   
15 or  $\text{O}_2^+$  outputs. We adopted the  $\delta^{15}\text{N}$ ,  $\delta^{18}\text{O}$ , or  $\Delta^{17}\text{O}$  values only when concentrations  
16 measured by MS correlated with those measured by ion chromatography just after the  
17 sampling within 10% differences.

18 We repeated the analyses on the  $\delta^{15}\text{N}$ ,  $\delta^{18}\text{O}$ , and  $\Delta^{17}\text{O}$  values of nitrate at least three times for  
19 each sample to attain high precision. Most of the samples had nitrate concentrations of more  
20 than  $5.0 \mu\text{mol L}^{-1}$ , which corresponded to nitrate quantities greater than 50 nmol in a 10 mL  
21 sample. This amount was sufficient for determining the  $\delta^{15}\text{N}$ ,  $\delta^{18}\text{O}$ , and  $\Delta^{17}\text{O}$  values with high  
22 precision. The sample volume was increased to 30 mL for ~~those having~~ nitrate concentrations  
23 less than  $5.0 \mu\text{mol L}^{-1}$ ; the number of analyses was also increased in such cases. Thus, all  
24 isotopic data presented in this study have an error better than  $\pm 0.2\text{‰}$  for  $\delta^{15}\text{N}$ ,  $\pm 0.3\text{‰}$  for  $\delta^{18}\text{O}$ ,  
25 and  $\pm 0.1\text{‰}$  for  $\Delta^{17}\text{O}$ .

26 Because the more precise power law shown in Eq. (1) was used to calculate  $\Delta^{17}\text{O}$ , the  
27 estimated  $\Delta^{17}\text{O}$  values were somewhat different from those estimated based on traditional  
28 linear approximation (Michalski et al. 2002). Please note that our  $\Delta^{17}\text{O}$  values of  $\text{NO}_3^-_{\text{atm}}$   
29 would be  $0.9 \pm 0.1 \text{‰}$  higher if we ~~use~~ the linear approximation. However, these differences  
30 were insignificant for most of the stream water samples evaluated in this study.

31 Nitrite ( $\text{NO}_2^-$ ) in the samples interferes with the final  $\text{N}_2\text{O}$  produced from nitrate ( $\text{NO}_3^-$ )  
32 because the chemical method also converts  $\text{NO}_2^-$  to  $\text{N}_2\text{O}$  (Mcilvin and Altabet 2005).



1 Therefore, it is sometimes necessary to correct for the contribution of  $\text{NO}_2^-$ -derived  $\text{N}_2\text{O}$  to  
 2 accurately determine the stable isotopic compositions of the sample nitrate. However, all  
 3 samples analysed for stable isotopic compositions in this study showed  $\text{NO}_2^-/\text{NO}_3^-$  ratios of  
 4 less than 5%; thus, the results were used with no corrections.

## 5 **2.4 Calculating average concentration and isotopic compositions in each** 6 **stream**

7 To quantitatively clarify the chemical and isotopic characteristics of each stream, we  
 8 determined both the flow-weighted annual average concentration ( $\bar{C}_{\text{total}}$ ) and flow-weighted  
 9 annual average  $\delta^{15}\text{N}$ ,  $\delta^{18}\text{O}$ , and  $\Delta^{17}\text{O}$  values ( $\bar{\delta}$ ) of nitrate for each stream by using Eqs. (3),  
 10 (4), and (5):

$$11 \quad q = \sum_{n=1}^4 (f_n \cdot \Delta t_n), \quad (3)$$

$$12 \quad \bar{C}_{\text{total}} = \frac{\sum_{n=1}^4 (C_n \cdot f_n \cdot \Delta t_n)}{q}, \quad (4)$$

$$13 \quad \bar{\delta} = \frac{\sum_{n=1}^4 (\delta_n \cdot C_n \cdot f_n \cdot \Delta t_n)}{\sum_{n=1}^4 (C_n \cdot f_n \cdot \Delta t_n)}, \quad (5)$$

14 where  $C_n$  and  $\delta_n$  denote the concentration ( $C_{\text{total}}$  in Eq. (2)) and isotopic values ( $\delta^{15}\text{N}$ ,  $\delta^{18}\text{O}$ , or  
 15  $\Delta^{17}\text{O}$ ) of nitrate in each stream during each observation  $n$ , respectively;  $f_n$  denotes the flow  
 16 rate of each stream during each observation  $n$ ; and  $\Delta t_n$  denotes the time interval between the  
 17 observation  $n$  and the next observation  $n+1$ . When possible, we used the flow rate of each  
 18 stream which was determined monthly by the Shiga Prefecture (Shiga\_Prefecture 2015) for  $f_n$ .  
 19 For small streams with no data for the flow rate, we used a small and stable flow rate of 0.1  
 20  $\text{m}^3/\text{s}$  for  $f_n$ .

## 21 **2.5 Calculating $\delta^{15}\text{N}$ and $\delta^{18}\text{O}$ of remineralized nitrate**

22 To exclude the contribution of  $\text{NO}_3^-_{\text{atm}}$  from the  $\delta^{15}\text{N}$  and  $\delta^{18}\text{O}$  values of **nitrate** and to clarify  
 23 the source and behaviour of  $\text{NO}_3^-_{\text{re}}$  by using both  $\delta^{15}\text{N}$  and  $\delta^{18}\text{O}$  as tracers, we estimated the  
 24 end-member  $\delta^{15}\text{N}$  and  $\delta^{18}\text{O}$  values of the remineralized nitrate portion,  $\delta^{15}\text{N}_{\text{re}}$  and  $\delta^{18}\text{O}_{\text{re}}$ , by

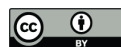

1 excluding the contribution of  $\text{NO}_3^-$  in each nitrate (Dejwakh et al. 2012; Liu et al. 2013;  
2 Riha et al. 2014; Tsunogai et al. 2011; Tsunogai et al. 2010; Tsunogai et al. 2014) by using  
3 Eqs. (6) and (7):

$$4 \quad \delta^{15}\text{N}_{\text{re}} = \frac{C_{\text{total}} \cdot \delta^{15}\text{N} - C_{\text{atm}} \cdot \delta^{15}\text{N}_{\text{atm}}}{C_{\text{total}} - C_{\text{atm}}}, \quad (6)$$

$$5 \quad \delta^{18}\text{O}_{\text{re}} = \frac{C_{\text{total}} \cdot \delta^{18}\text{O} - C_{\text{atm}} \cdot \delta^{18}\text{O}_{\text{atm}}}{C_{\text{total}} - C_{\text{atm}}}, \quad (7)$$

6 where  $C_{\text{atm}}$  and  $C_{\text{total}}$  denote the concentration of  $\text{NO}_3^-$  and nitrate in each water sample,  
7 respectively, and  $\delta^{15}\text{N}_{\text{atm}}$ ,  $\delta^{18}\text{O}_{\text{atm}}$ , and  $\Delta^{17}\text{O}_{\text{atm}}$  denote the  $\delta^{15}\text{N}$ ,  $\delta^{18}\text{O}$ , and  $\Delta^{17}\text{O}$  values of  
8  $\text{NO}_3^-$  in each sample, respectively. The actual values of  $\delta^{15}\text{N}_{\text{atm}}$ ,  $\delta^{18}\text{O}_{\text{atm}}$ , and  $\Delta^{17}\text{O}_{\text{atm}}$  used  
9 in this study will be determined in section 3.1.

10

### 11 3 Results and Discussion

#### 12 3.1 Atmospheric Nitrate

13 The triple oxygen isotopic compositions ( $\Delta^{17}\text{O}$ ) of atmospheric nitrate ( $\text{NO}_3^-$ ) are plotted in  
14 Fig. 3(c) as a function of the sampling day (local time, UT +9:00), together with the  $\delta^{15}\text{N}$  and  
15  $\delta^{18}\text{O}$  of  $\text{NO}_3^-$  in Figs. 3(a) and 3(b). The atmospheric nitrate at Sado-seki monitoring  
16 station showed large  $^{17}\text{O}$  anomalies with  $\Delta^{17}\text{O}$  values from +18.6‰ to +32.4‰.

17 Moreover, a clear normal correlation with  $\delta^{18}\text{O}$  was shown (Supplement Fig. S1). A similar  
18 trend has been reported in atmospheric nitrate aerosols collected for a one-year period in La  
19 Jolla, California (32.7°N, 117.2°W) (Michalski et al. 2003), and in other areas worldwide  
20 (Kaiser et al. 2007; Morin et al. 2009). Michalski et al. (2003) interpreted that the linear  
21 correlation corresponds to the mixing line between the tropospheric ozone and tropospheric  
22  $\text{H}_2\text{O}$ , and thus tropospheric OH radicals, with  $\Delta^{17}\text{O} = 0\text{‰}$  and  $\delta^{18}\text{O} = -5\text{‰}$ . The  $\text{NO}_3^-$  data  
23 obtained at Sado-seki monitoring station, however, showed a somewhat different trend in the  
24  $\Delta^{17}\text{O}$ – $\delta^{18}\text{O}$  plot between summer, from May to October, and winter, from November to April  
25 (Supplement Fig. S1). Although the linearly fitted line to the summer data showed a slope of  
26  $2.21 \pm 0.22$  and an intercept of  $+19.7 \pm 5.1\text{‰}$  in the  $\Delta^{17}\text{O}$ – $\delta^{18}\text{O}$  plot, that to the winter data  
27 showed a statistically significant larger slope of  $2.89 \pm 0.38$  and the smaller intercept of  $+3.0$   
28  $\pm 9.2\text{‰}$ ; all errors were in the  $2\sigma$  range. Although the winter data included an intercept of



1    −5‰ as the end member  $\delta^{18}\text{O}$  value of the tropospheric OH radical within the possible error  
 2    range, as reported by Michalski et al. (2003), the intercept of summer data deviated strongly  
 3    from the value. Because the monitoring station is located in the Asian monsoon area, the  
 4    major air mass that arrived at the station was seasonally different; Pacific air originated from  
 5    the south-eastern direction in summer whereas continental air originated from north-western  
 6    direction in winter. The present results imply seasonal and regional changes in the  $\delta^{18}\text{O}/\Delta^{17}\text{O}$   
 7    ratios of tropospheric ozone and in the OH radical.

8    On the basis of both the temporal variation in the depositional flux of  $\text{NO}_3^-$  and the  $\Delta^{17}\text{O}$   
 9    value, we estimated the average  $\Delta^{17}\text{O}$  value of  $\text{NO}_3^-$  ( $\Delta^{17}\text{O}_{\text{avg}}$ ) deposited at Sado-seki  
 10    monitoring station as +25.5‰ for FY2009, +27.2‰ for FY2010, +25.7‰ for FY2011, and  
 11    +26.3‰ for the three years by using

$$12 \quad \Delta^{17}\text{O}_{\text{avg}} = \frac{\sum_k (C_k \cdot V_k \cdot \Delta^{17}\text{O}_k)}{\sum_k (C_k \cdot V_k)}, \quad (8)$$

13    where  $C_k$  denotes the concentration of nitrate in each wet deposition sample, and  $V_k$  denotes  
 14    the total water volume of each wet deposition sample. Substituting  $\Delta^{17}\text{O}$  with  $\delta^{15}\text{N}$  ( $\delta^{18}\text{O}$ ) in  
 15    Eq. (8), we estimated  $\delta^{15}\text{N}_{\text{avg}}$  ( $\delta^{18}\text{O}_{\text{avg}}$ ) as −4.4 ‰ (+78.5‰) for FY2009, −3.8 ‰ (+81.8‰)  
 16    for FY2010, −4.4 ‰ (+78.6‰) for FY2011, and −4.2‰ (+79.8‰) for the three years.

17    To apply the  $\Delta^{17}\text{O}_{\text{avg}}$  values obtained at Sado-seki monitoring station as  $\Delta^{17}\text{O}$  of  $\text{NO}_3^-$   
 18    deposited into the studied watershed (i.e.  $\Delta^{17}\text{O}_{\text{atm}}$  in Eq. (2)), however, additional corrections  
 19    could be needed because the  $\Delta^{17}\text{O}$  value of  $\text{NO}_3^-$  is a function of the  $\text{NO}_x$  oxidation  
 20    channels in the atmosphere that shift depending on the intensity of sunlight, temperature, and  
 21    oxidant levels (e.g. Alexander et al. 2009; Kunasek et al. 2008; Michalski et al. 2003; Morin  
 22    et al. 2012; Morin et al. 2008; Savarino et al. 2013). The latitudinal difference between Sado-  
 23    seki monitoring station (38°15'N, 138°24'E; Fig. 2) and the watershed studied (35°15'N,  
 24    136°5'E; Fig. 2) could change the intensity of sunlight and thus the  $\text{NO}_x$  oxidation channel.  
 25    Moreover, Tsunogai et al. (2010) reported that nitrate in polluted air masses derived directly  
 26    from megacities in winter showed slightly larger  $\Delta^{17}\text{O}$  values than those in the same seasons  
 27    owing likely to the relative increase in the reaction via  $\text{NO}_3$  radicals within the entire  $\text{NO}_3^-$   
 28    production channel to produce  $\text{NO}_3^-$  in the polluted air mass. The annual average  $\Delta^{17}\text{O}$   
 29    values determined in this study was the lowest value in FY2009 when the deposition rate was  
 30    the smallest, at  $19.3 \text{ mmol m}^{-2}\text{y}^{-1}$  (EANET 2014), whereas the annual average  $\Delta^{17}\text{O}$  value



1 was the highest value in FY2010 when the deposition rate was the largest, at  $28.0 \text{ mmol m}^{-2}\text{y}^{-1}$  for nitrate, within the three years of observation. These results also imply that we must  
 2 ~~correct for~~ the difference in arrival frequency of polluted air mass as well.

4 Nevertheless, both the annual average and the seasonal variation range of  $\Delta^{17}\text{O}$  correlated  
 5 strongly with those determined at Rishiri monitoring station ( $45^{\circ}07'11''\text{N}$ ,  $141^{\circ}12'33''\text{E}$ ) in  
 6 FY2008, at  $+26.2\%$  (Tsunogai et al. 2010), where the wet deposition rate of  $\text{NO}_3^-$  atm was an  
 7 average 40% smaller than at Sado-seki monitoring station from 2000 to 2013 (EANET 2014).  
 8 Moreover, the values also coincided with those reported for mid-latitudes, such as at La Jolla,  
 9 at  $33^{\circ}\text{N}$  (Michalski et al. 2003) and Princeton, at  $40^{\circ}\text{N}$  (Kaiser et al. 2007). We concluded that  
 10 by allowing an appropriate range of errors presented later, the obtained  $\Delta^{17}\text{O}_{\text{avg}}$  value of  
 11  $\text{NO}_3^-$  atm can represent those deposited at middle latitudes worldwide, including the Lake Biwa  
 12 watershed basin.

13 In addition, the actual  $\Delta^{17}\text{O}_{\text{atm}}$  values of  $\text{NO}_3^-$  atm in each stream water sample can differ from  
 14 the  $\Delta^{17}\text{O}_{\text{avg}}$  owing to the seasonal variation in the  $\Delta^{17}\text{O}$  values of  $\text{NO}_3^-$  atm. In correcting for the  
 15 seasonal variation, however, it is not adequate to use the  $\Delta^{17}\text{O}$  values determined for the  
 16 seasons of sampling, as  $\Delta^{17}\text{O}_{\text{atm}}$  in Eq. (2), because the duration of the recession period is  
 17 longer than a few months for most of the forest catchments in Japan with a humid temperate  
 18 climate (Ohte et al. 2010; Takimoto et al. 1994). That is, nitrate in base flow stream water had  
 19 been stored in subsurface runoff and groundwater, of which seasonal  $\Delta^{17}\text{O}$  changes have not  
 20 been found thus far (Nakagawa et al. 2013; Tsunogai et al. 2010).

21 In summary, we used the obtained  $\Delta^{17}\text{O}_{\text{avg}}$  value of  $\text{NO}_3^-$  atm as  $\Delta^{17}\text{O}_{\text{atm}}$  in Eq. (2) to estimate  
 22  $C_{\text{atm}}$  in the streams of the Lake Biwa watershed basin by allowing the error range of  $3.0\%$ ,  
 23 considering the whole factor change of  $\Delta^{17}\text{O}_{\text{atm}}$  from  $\Delta^{17}\text{O}_{\text{avg}}$ . About 65% of the all  $\Delta^{17}\text{O}$  data  
 24 of  $\text{NO}_3^-$  atm obtained at Sado-seki monitoring station were included in this range of  $+26.3 \pm$   
 25  $3.0\%$ .

26 In the case of  $\delta^{15}\text{N}$  and  $\delta^{18}\text{O}$ , the values of  $\text{NO}_3^-$  atm in each stream water sample (i.e.  $\delta^{15}\text{N}_{\text{atm}}$   
 27 and  $\delta^{18}\text{O}_{\text{atm}}$  in Eqs. (6) and (7)) differed further from  $\delta^{15}\text{N}_{\text{avg}}$  and  $\delta^{18}\text{O}_{\text{avg}}$  owing to isotopic  
 28 fractionation during partial removal subsequent to deposition. As a result, while using the  
 29  $\delta^{15}\text{N}_{\text{avg}}$  and  $\delta^{18}\text{O}_{\text{avg}}$  values as  $\delta^{15}\text{N}_{\text{atm}}$  and  $\delta^{18}\text{O}_{\text{atm}}$ , we assumed much larger error range on the  
 30 values; i.e.  $\pm 10\%$  for both  $\delta^{15}\text{N}$  and  $\delta^{18}\text{O}$ . We will further discuss the appropriateness of  
 31 these error ranges section 3.3. Because of the small  $C_{\text{atm}}/C_{\text{total}}$  ratios of stream water at



1 generally less than 7% (section 3.2), the error propagated to  $\delta^{15}\text{N}_{\text{re}}$  and  $\delta^{18}\text{O}_{\text{re}}$  was generally  
2 small, less than 1‰ and 2‰, respectively, for most of the data presented in this study.

### 3 **3.2 Stream nitrate overview**

4 The concentrations ( $C_{\text{total}}$ ) and  $\delta^{15}\text{N}$ ,  $\delta^{18}\text{O}$ , and  $\Delta^{17}\text{O}$  values of nitrate in the stream water  
5 samples determined for each observation ( $n = 1, 2, 3$ , and 4) are presented in Fig. 4. The  
6 annual average concentration ( $\overline{C_{\text{total}}}$ ) and annual average  $\delta^{15}\text{N}$ ,  $\delta^{18}\text{O}$ , and  $\Delta^{17}\text{O}$  values ( $\overline{\delta^{15}\text{N}}$ ,  
7  $\overline{\delta^{18}\text{O}}$ , and  $\overline{\Delta^{17}\text{O}}$ , respectively) in each stream estimated by using Eqs. (3), (4), and (5) are  
8 shown in the figure as black bars. In this figure, each stream was plotted on the x-axis in the  
9 order of location beginning from stream No. 31, which lies southwest of all of the streams  
10 (Fig. 2), and proceeding in a clockwise direction. The spatially continuous variation in the  
11 values of  $\overline{\delta^{15}\text{N}}$ ,  $\overline{\delta^{18}\text{O}}$ , and  $\overline{\Delta^{17}\text{O}}$  imply that the values may represent land use changes in each  
12 catchment area.

13 Although the  $\Delta^{17}\text{O}$  values presented significant ~~area~~ and temporal variation from +0.0‰ to  
14 +6.8‰, the range of the  $\Delta^{17}\text{O}$  values from +0.5‰ to +3.1‰ was typical for nitrate in natural  
15 stream water (Liu et al. 2013; Michalski et al. 2004; Rose et al. 2015; Tsunogai et al. 2010;  
16 Tsunogai et al. 2014). These results correspond to the mixing ratios of unprocessed  $\text{NO}_3^-_{\text{atm}}$  to  
17 total nitrate from  $1.8 \pm 0.3\%$  to  $11.8 \pm 1.3\%$ , obtained by using Eq. (2).

18 By using the concentration ( $C_{\text{total}}$ ) and  $\delta^{15}\text{N}$ ,  $\delta^{18}\text{O}$ , and  $\Delta^{17}\text{O}$  values of nitrate, the  $\text{NO}_3^-_{\text{atm}}$   
19 concentration ( $C_{\text{atm}}$ ) and the  $\delta^{15}\text{N}$  and  $\delta^{18}\text{O}$  values of the remineralized portion of nitrate  
20 ( $\delta^{15}\text{N}_{\text{re}}$  and  $\delta^{18}\text{O}_{\text{re}}$ ) in the samples were calculated by using Eqs. (2), (6), and (7) and are  
21 plotted in Fig. 5. In addition, the annual average concentration of  $\text{NO}_3^-_{\text{atm}}$  ( $\overline{C_{\text{atm}}}$ ) and annual  
22 average values of  $\delta^{15}\text{N}_{\text{re}}$  and  $\delta^{18}\text{O}_{\text{re}}$  ( $\overline{\delta^{15}\text{N}_{\text{re}}}$  and  $\overline{\delta^{18}\text{O}_{\text{re}}}$ , respectively) in stream nitrate were  
23 calculated and are presented in Fig. 5 as black bars. Because of the large  $\delta^{18}\text{O}$  differences of  
24 about 80‰ between nitrate in streams and  $\text{NO}_3^-_{\text{atm}}$ , the  $\delta^{18}\text{O}_{\text{re}}$  values were a few ‰ lower  
25 than each original  $\delta^{18}\text{O}$  value in total nitrate. On the contrary, owing to the small  $\delta^{15}\text{N}$   
26 differences of less than 15‰ between the total nitrate in streams and  $\text{NO}_3^-_{\text{atm}}$ , as well as the  
27 small  $C_{\text{atm}}/C_{\text{total}}$  ratios in the streams, most of the  $\delta^{15}\text{N}_{\text{re}}$  values showed small deviations of  
28 less than 1‰ from each original  $\delta^{15}\text{N}$  value in the total nitrate in most of the streams.

29 To verify possible **secular changes**, the estimated  $\overline{C_{\text{total}}}$ ,  $\overline{\delta^{15}\text{N}}$ , and  $\overline{\delta^{18}\text{O}}$  for each stream were  
30 compared with those determined by Ohte et al. (2010) in which annual average concentration



1 and annual average  $\delta^{15}\text{N}$  and  $\delta^{18}\text{O}$  values of nitrate (total) were determined for the same  
 2 streams in 2004 to 2006 (Supplement Fig. S2). Although both concentrations and  $\delta^{15}\text{N}$  and  
 3  $\delta^{18}\text{O}$  values in the streams showed significant ~~areal~~ and temporal variations during 2013, as  
 4 presented in Fig. 4, the annual average values almost correlated with the values determined in  
 5 2004 to 2006. We concluded that secular changes were minimal for nitrate in the streams, at  
 6 least for the most recent 10-year period of observations.

### 7 3.3 Relationship between $\Delta^{17}\text{O}$ and $\delta^{18}\text{O}$

8 One of the features in the ~~areal~~ variation shown in Fig. 4 is the positive correlation between  
 9  $\Delta^{17}\text{O}$  and  $\delta^{18}\text{O}$ . As clearly ~~presented in~~ the relationship between  $\overline{\Delta^{17}\text{O}}$  and  $\overline{\delta^{18}\text{O}}$  (Fig. 6), these  
 10 values showed linear correlation with the  $r^2$  value of 0.88. Because  $\text{NO}_3^-_{\text{atm}}$  is characterized  
 11 by highly elevated values of both  $\Delta^{17}\text{O}$  and  $\delta^{18}\text{O}$  (Fig. 3), changes in the mixing ratio of  
 12 unprocessed  $\text{NO}_3^-_{\text{atm}}$  within the total nitrate pool must be ~~strongly~~ responsible for the positive  
 13 correlation between  $\overline{\Delta^{17}\text{O}}$  and  $\overline{\delta^{18}\text{O}}$  for nitrate in the streams.

14 The slope value of the least-squares-fitted line between  $\overline{\Delta^{17}\text{O}}$  and  $\overline{\delta^{18}\text{O}}$  (Fig. 6) also supports  
 15 this hypothesis. By extrapolating the least-square-fitted line to the region of  $\text{NO}_3^-_{\text{atm}}$  having a  
 16  $\Delta^{17}\text{O}$  value of +26.3‰, we obtained  $\delta^{18}\text{O} = +86 \pm 7\text{‰}$ , which also corresponds with the  
 17 average  $\delta^{18}\text{O}$  value of  $\text{NO}_3^-_{\text{atm}}$  of +79.8‰ obtained in section 3.1. We concluded that  $\overline{\delta^{18}\text{O}}$   
 18 values primarily reflect the mixing ratio of  $\text{NO}_3^-_{\text{atm}}$  within nitrate as well.

19 By extrapolating the linear correlation between  $\overline{\Delta^{17}\text{O}}$  and  $\overline{\delta^{18}\text{O}}$  to  $\overline{\Delta^{17}\text{O}} = 0\text{‰}$ , we obtained the  
 20  $\delta^{18}\text{O}$  value of  $-2.9 \pm 1.2\text{‰}$  as the average  $\delta^{18}\text{O}$  value of the remineralized portion of nitrate  
 21 ( $\text{NO}_3^-_{\text{re}}$ ) in the streams. Although the  $\delta^{18}\text{O}$  value was substantially  $^{18}\text{O}$ -depleted compared  
 22 with that obtained through in vitro incubation experiments in past studies (Burns and Kendall  
 23 2002; Mayer et al. 2001; Spoelstra et al. 2007), it correlated strongly with the  $\delta^{18}\text{O}$  value of  
 24  $\text{NO}_3^-_{\text{re}}$  determined recently by using the linear relationship between  $\Delta^{17}\text{O}$  and  $\delta^{18}\text{O}$ . This  
 25 correlation occurred in the groundwater of cool-temperate forested watersheds at  $-4.2 \pm 2.4\text{‰}$ ,  
 26 where the  $\delta^{18}\text{O}(\text{H}_2\text{O})$  was around  $-13\text{‰}$  (Tsunogai et al. 2010) and in stream water in a cool-  
 27 temperate forested watershed at  $-3.6 \pm 0.7\text{‰}$ , where the  $\delta^{18}\text{O}(\text{H}_2\text{O})$  was around  $-11\text{‰}$   
 28 (Tsunogai et al. 2014). Moreover, the  $\delta^{18}\text{O}$  value of  $\text{NO}_3^-_{\text{re}}$  obtained in this study,  $-2.9 \pm$   
 29  $1.2\text{‰}$ , is close to the possible lowermost  $\delta^{18}\text{O}$  value of  $\text{NO}_3^-_{\text{re}}$  produced through nitrification  
 30 under  $\text{H}_2\text{O}$  of  $-7.8 \pm 1.0\text{‰}$  (Buchwald et al. 2012). Furthermore, the  $\delta^{18}\text{O}$  value of  $\text{NO}_3^-_{\text{re}}$



1 correlates strongly with that obtained through in vitro incubation experiments in recent studies  
 2 that simulated temperate forest soils (Fang et al. 2012). We concluded that the  $\delta^{18}\text{O}$  value of  
 3  $\text{NO}_3^-_{\text{re}}$  produced through nitrification in the temperate watershed having  $\delta^{18}\text{O}(\text{H}_2\text{O})$  values of  
 4  $-7.8 \pm 1.0\text{‰}$  was  $-2.9 \pm 1.2\text{‰}$  and that we should use such a low  $\delta^{18}\text{O}$  value as for that  
 5 produced through nitrification in the watershed. Understanding the relationship between  $\Delta^{17}\text{O}$   
 6 and  $\delta^{18}\text{O}$  of nitrate shown in Fig. 6 is highly useful for determining the  $\delta^{18}\text{O}$  value of  $\text{NO}_3^-_{\text{re}}$   
 7 in each watershed (Tsunogai et al. 2010).

8 Although the  $\Delta^{17}\text{O}$  values of nitrate were stable during the biogeochemical processing such as  
 9 partial removal through assimilation or denitrification, the  $\delta^{18}\text{O}$  values of nitrate could vary  
 10 through the isotopic fractionation processes within each catchment area. Nevertheless, the  
 11  $\overline{\delta^{18}\text{O}}$  values of nitrate in the streams were plotted on the mixing line between the  $\text{NO}_3^-_{\text{atm}}$  that  
 12 had been deposited into the watershed and  $\text{NO}_3^-_{\text{re}}$  having  $\delta^{18}\text{O}$  and  $\Delta^{17}\text{O}$  values close to those  
 13 produced through nitrification in the catchments. We concluded that the range of isotopic  
 14 fractionations owing to partial removal through assimilation or denitrification subsequent to  
 15 deposition of  $\text{NO}_3^-_{\text{atm}}$  or production of  $\text{NO}_3^-_{\text{re}}$  within each catchment area was generally small  
 16 for the major portion of nitrate eluted from the watershed. This result also supports our  
 17 assumption in section 3.1 such that the actual  $\delta^{15}\text{N}$  and  $\delta^{18}\text{O}$  values of  $\text{NO}_3^-_{\text{atm}}$  in each stream  
 18 water sample ( $\delta^{15}\text{N}_{\text{atm}}$  and  $\delta^{18}\text{O}_{\text{atm}}$  in Eqs. (6) and (7)) correlate with the  $\delta^{15}\text{N}_{\text{avg}}$  and  $\delta^{18}\text{O}_{\text{avg}}$   
 19 estimated at Sado-seki monitoring station within an error of  $\pm 10\text{‰}$ .

#### 20 **3.4 $\delta^{15}\text{N}$ values of remineralized nitrate in streams**

21 To trace the source of the  $^{18}\text{O}$ -depleted  $\text{NO}_3^-_{\text{re}}$  eluted from the watershed into the lake, the  
 22 annual average  $\delta^{15}\text{N}$  values of the remineralized portion of nitrate ( $\overline{\delta^{15}\text{N}_{\text{re}}}$ ) in each inflow  
 23 stream were estimated and are plotted as a function of population density in Fig. 7(c), together  
 24 with  $\overline{\delta^{18}\text{O}_{\text{re}}}$  and  $\overline{\delta^{18}\text{O}}$  in Fig. 7(d). Although the annual average  $\overline{\delta^{18}\text{O}_{\text{re}}}$  values were low and  
 25 almost uniform from  $-4.0\text{‰}$  to  $-0.1\text{‰}$ , as implied in the linear correlation between  $\overline{\Delta^{17}\text{O}}$  and  
 26  $\overline{\delta^{18}\text{O}}$  in Fig. 6,  $\overline{\delta^{15}\text{N}_{\text{re}}}$  showed larger variation from  $+1.7\text{‰}$  to  $+10.9\text{‰}$ . Moreover,  $\overline{\delta^{15}\text{N}_{\text{re}}}$   
 27 showed positive correlation with the population density (Fig. 7). A similar trend was reported  
 28 for the  $\delta^{15}\text{N}$  values of total nitrate in past studies in this watershed (Ohte et al. 2010) and  
 29 others (Mayer et al. 2002). We further verified that the remineralized portion of nitrate  
 30 ( $\text{NO}_3^-_{\text{re}}$ ) was responsible for the positive correlation between the  $\delta^{15}\text{N}$  values of total nitrate  
 31 and population density.



Both the concentrations and the isotopic compositions shown in Fig. 7 clearly demonstrate that most portions of the nitrate eluted from the catchments with lower population densities of less than  $100 \text{ km}^{-2}$  were produced through nitrification in naturally occurring soil organic matter (Kendall et al. 1995; Ohte et al. 2010), showing  $\delta^{15}\text{N}$  values of  $+4.4 \pm 1.8\text{‰}$  and  $\delta^{18}\text{O}$  values of about  $-2.3 \pm 0.9\text{‰}$ . In this section, we discuss the source of the  $^{15}\text{N}$ -enriched  $\text{NO}_3^-$  re eluted from the catchments with higher population densities of more than  $1000 \text{ km}^{-2}$ , showing  $\delta^{15}\text{N}$  values of  $+9.2 \pm 1.3\text{‰}$  or more and  $\delta^{18}\text{O}$  values of about  $-2.2 \pm 1.1\text{‰}$ .

Denitrification in riverbed sediments adjacent to riparian zones or groundwater bodies (McMahon and Böhlke 1996) can increase the  $\delta^{15}\text{N}$  value of stream nitrate. However, if such post-production alteration were responsible for the  $^{15}\text{N}$  enrichment of  $\text{NO}_3^-$  re and thus the total nitrate, the values of  $\delta^{18}\text{O}$  re in addition to those of  $\delta^{15}\text{N}$  re should increase (Granger et al. 2008). Moreover, the absolute concentration of  $\text{NO}_3^-$  atm ( $C_{\text{atm}}$ ) should decrease in accordance with the progress of denitrification. The low and uniform  $\delta^{18}\text{O}$  re values (Fig. 7(d)) as well as the uniform  $C_{\text{atm}}$  irrespective of the population densities (Fig. 7(b)) imply that the denitrification in riverbed sediments was minor for nitrate in the streams. Rather, the  $\text{NO}_3^-$  re must be enriched in  $^{15}\text{N}$  from its initial production through nitrification within the catchments with high population densities. In addition, the small differences in  $\delta^{18}\text{O}$  values of  $\text{NO}_3^-$  re between those values irrespective of the population densities in the catchment area (Fig. 7) imply that the essential parameters for determining the  $\delta^{18}\text{O}$  values of nitrate during nitrification, such as the  $\delta^{18}\text{O}$  values of  $\text{H}_2\text{O}$  and pH of soils (Buchwald et al. 2012; Fang et al. 2012), should be similar between them.

Based on the  $\delta^{15}\text{N}$  values of total nitrate eluted from catchments with high population densities, as well as the positive correlation between the  $\delta^{15}\text{N}$  values of total nitrate and population densities, Ohte et al. (2010) proposed sewage effluent as the dominant source contributing to the increase in the  $\delta^{15}\text{N}$  values of total nitrate eluted from such catchments. The  $\delta^{15}\text{N}$  and  $\delta^{18}\text{O}$  values of  $\text{NO}_3^-$  re newly estimated in this study,  $+9.2 \pm 1.3\text{‰}$  or more and  $-2.2 \pm 1.1\text{‰}$ , respectively, also imply that the dominant source contributing to the increase in the  $\delta^{15}\text{N}$  values of total nitrate had been produced through nitrification in which the source N of the nitrate had already been enriched in  $^{15}\text{N}$ . Although the  $\delta^{15}\text{N}$  and  $\delta^{18}\text{O}$  values of  $\text{NO}_3^-$  re eluted from the high population density catchments,  $\delta^{15}\text{N}_{\text{re}} = +9.2 \pm 1.3\text{‰}$  and  $\delta^{18}\text{O}_{\text{re}} = -2.2 \pm 1.1\text{‰}$ , were a few ‰ lower than the  $\delta^{15}\text{N}$  and  $\delta^{18}\text{O}$  values of total nitrate in the sewage effluent determined in past studies (Aravena et al. 1993; Wankel et al. 2006; Widory et al.



2005; Xue et al. 2009), the slight deviations in the reported  $\delta^{15}\text{N}$  and  $\delta^{18}\text{O}$  values from our results can be explained by the following factors: (1) a slight contribution of  $\text{NO}_3^-_{\text{atm}}$ , and (2) the progress of denitrification subsequent to production. We concluded that sewage effluent was the most probable pollution source of nitrate to explain the observed concentrations and isotopic compositions of nitrate eluted from the catchments with high population densities, particularly for those more than  $1000 \text{ km}^{-2}$ .

### 3.5 Seasonal variation

Although the annual average values of  $\Delta^{17}\text{O}$  and  $\delta^{18}\text{O}$  in each river,  $\overline{\Delta^{17}\text{O}}$  and  $\overline{\delta^{18}\text{O}}$ , respectively, showed linear correlation as presented in Fig. 6, the same results were not always attained for those in each season. Particularly for those obtained during June and August (i.e. summer), some of the streams showed significant deviations in  $\delta^{18}\text{O}$  of more than 5‰ from the hypothetical mixing line between  $\text{NO}_3^-_{\text{atm}}$  ( $\Delta^{17}\text{O} = +26.3$  ‰ and  $\delta^{18}\text{O} = 79.8$  ‰) and  $\text{NO}_3^-_{\text{re}}$  ( $\Delta^{17}\text{O} = 0$  ‰ and  $\delta^{18}\text{O} = -2.9$  ‰; Fig. 6). Even though the values of  $\Delta^{17}\text{O}$  and  $\delta^{18}\text{O}$  of  $\text{NO}_3^-_{\text{atm}}$  showed seasonal variation, as presented in Fig. 3, it could not explain the large deviations from the mixing line based on the seasonal changes in  $\text{NO}_3^-_{\text{atm}}$ . Rather, we must assume some seasonal changes in the biogeochemical nitrogen cycles within each catchment area to explain the relationship because different from that of the  $\Delta^{17}\text{O}$  values, the  $\delta^{18}\text{O}$  values of nitrate can vary during biogeochemical processing within each catchment area. As a result, we can evaluate the seasonal changes in the biogeochemical processing within each catchment area by using the seasonal changes in the relationship between  $\Delta^{17}\text{O}$  and  $\delta^{18}\text{O}$  shown in Fig. 8.

The increases in the number of data plotted on the highly  $^{18}\text{O}$ -enriched region of more than a few ‰ in  $\delta^{18}\text{O}$  from the lines imply that partial nitrate removal through assimilation or denitrification was active within each catchment area in June and August. The areal differences in the  $^{18}\text{O}$  enrichment also support this hypothesis. As presented in Fig. 8,  $^{18}\text{O}$  enrichments were common in samples obtained at the southern streams having high population densities in each catchment area, as shown in the figure by white squares. We can anticipate elevated loading of both nutrients and organic matter of anthropogenic origin in these catchments, both of which naturally enhance both assimilation and denitrification.

On the contrary, most samples obtained during March and October were distributed on the hypothetical mixing line between  $\text{NO}_3^-_{\text{atm}}$  and  $\text{NO}_3^-_{\text{re}}$  as presented in Fig. 8. We concluded



1 that in winter, the range of isotopic fractionation subsequent to production, such as partial  
2 removal through assimilation or denitrification, was generally small for the major portion of  
3 nitrate eluted from the watershed and fed into the lake. Therefore, the annual average values  
4 (i.e.  $\overline{\delta^{18}\text{O}}$  and  $\overline{\Delta^{17}\text{O}}$ ) of streams were distributed on the hypothetical mixing line, as shown in  
5 Fig. 6, because the nitrate influx in winter occupied a major portion of the annual nitrate  
6 influx. Active removal of nitrate from the streams through denitrification/assimilation in  
7 summer was also responsible for the small relative importance of nitrate influx into the lake in  
8 summer. In conclusion, the relationship between  $\Delta^{17}\text{O}$  and  $\delta^{18}\text{O}$  of nitrate eluted from a  
9 catchment area is a useful indicator for evaluating the biogeochemical processing within the  
10 catchment area, including the seasonal change.

### 11 **3.6 Area and temporal $\Delta^{17}\text{O}$ variation**

12 By using the  $\delta^{18}\text{O}$  values of nitrate as tracers, Ohte et al. (2010) found that the mixing ratios  
13 of unprocessed  $\text{NO}_3^-_{\text{atm}}$  within the total nitrate pool were high in the northern streams of the  
14 watershed in winter, from November to late April. Our present results further verified the past  
15 results shown in Fig. 4, which adds more robust evidence through the use of the  $\Delta^{17}\text{O}$  tracer  
16 for  $\text{NO}_3^-_{\text{atm}}$ .

17 Based on the high accumulation rate of snow in the catchment zones of the northern streams,  
18 Ohte et al. (2010) concluded that high loading of unprocessed  $\text{NO}_3^-_{\text{atm}}$  via snow in the  
19 catchment zones increased the stored unprocessed  $\text{NO}_3^-_{\text{atm}}$  in the snowpack, which was  
20 subsequently released into the streams during the melting seasons. This process enhanced the  
21 mixing ratio of unprocessed  $\text{NO}_3^-_{\text{atm}}$  within the total nitrate pool during the melting season,  
22 which was also reported for streams worldwide (Kendall et al. 1995; Ohte et al. 2004; Ohte et  
23 al. 2010; Pellerin et al. 2012; Piatek et al. 2005; Tsunogai et al. 2014). However, the  
24 contribution of nitrate from anthropogenic sources could be smaller in this area owing to  
25 lower population densities in the catchments (Table 1). Because a major portion of possible  
26 anthropogenic nitrate in the catchments must be occupied by  $\text{NO}_3^-_{\text{re}}$  (Ohte et al. 2010), a  
27 lower  $\text{NO}_3^-_{\text{re}}$  supply from anthropogenic sources in each catchment area could elevate the  
28 mixing ratio of unprocessed  $\text{NO}_3^-_{\text{atm}}$  within the total nitrate pool even if absolute  
29 concentration of  $\text{NO}_3^-_{\text{atm}}$  ( $C_{\text{atm}}$ ) was uniform in the streams.

30 To determine the  $C_{\text{atm}}$  variability among the streams, the  $C_{\text{atm}}$  values estimated in this study  
31 were plotted as a function of population densities in Fig. 7(b). The  $C_{\text{atm}}$  was almost uniform at



1  $2.3 \pm 1.1 \mu\text{mol L}^{-1}$  irrespective of changes in the population density of each catchment area.  
 2 However, a clear  $C_{\text{total}}$  enrichment trend was noted in accordance with the increase in  
 3 population densities of the catchments (Fig. 7(a)). Similar  $C_{\text{total}}$  enrichment trends have been  
 4 reported in previous studies (Ohte et al. 2010).

5 The northern streams such as Nos. 3, 4, and 5 were enriched in  $C_{\text{atm}}$ , showing  $C_{\text{atm}}$  annual  
 6 average values of  $5.3 \pm 0.9$ ,  $2.9 \pm 0.6$ , and  $4.3 \pm 0.8 \mu\text{mol L}^{-1}$ , respectively, and  $\Delta^{17}\text{O}$  values  
 7 of +3.1‰, +1.9‰, and +2.9‰, respectively. These results support the previous observation of  
 8 the streams determined by using the  $\delta^{18}\text{O}$  tracer. Similar  $C_{\text{atm}}$  enrichment of about  $3 \mu\text{mol L}^{-1}$   
 9 or more, however, was also found in streams in other areas, such as Nos. 14 ( $C_{\text{atm}} = 3.3 \pm 0.9$   
 10  $\mu\text{mol L}^{-1}$ ), 25 ( $3.2 \pm 0.7 \mu\text{mol L}^{-1}$ ), and 21 ( $4.2 \pm 0.8 \mu\text{mol L}^{-1}$ ), while showing lower  $\Delta^{17}\text{O}$   
 11 values of +0.9‰, +1.5‰, and +2.0‰, respectively, thus showing low mixing ratios of  
 12 unprocessed  $\text{NO}_3^-_{\text{atm}}$  within total nitrate. We concluded that the difference in the addition of  
 13 anthropogenic nitrate composed of  $\text{NO}_3^-_{\text{re}}$  in the catchments was primarily responsible for the  
 14 difference in the mixing ratio of unprocessed  $\text{NO}_3^-_{\text{atm}}$  within the total nitrate pool, as well as  
 15  $C_{\text{total}}$  variation in accordance with the population densities of the catchment area as shown in  
 16 Fig. 1. That is, a small contribution of anthropogenic nitrate in the catchments in the northern  
 17 rivers was primarily responsible for the low  $C_{\text{total}}$  and thus the high mixing ratio of  
 18 unprocessed  $\text{NO}_3^-_{\text{atm}}$  within the total nitrate pool, or  $C_{\text{atm}}/C_{\text{total}}$  ratios, in the northern streams  
 19 of the watershed.

20 Although the difference in the accumulation rate of snow between each catchment zone was  
 21 not the major factor controlling the  $C_{\text{atm}}/C_{\text{total}}$  ratios, the concentrated release of  $\text{NO}_3^-_{\text{atm}}$   
 22 stored in the snowpack during the melting seasons should be one of the important factors in  
 23 determining the  $C_{\text{atm}}$  variation among the streams. Most of the  $C_{\text{atm}}$ -enriched streams, such as  
 24 Nos. 3, 4, 5, 14, and 25, originated from forested catchment in high elevations of more than  
 25 800 m above sea level; thus, we can anticipate heavy snowpack in winter of each headwater.  
 26 Moreover, the maximum  $C_{\text{atm}}$  values in these streams were found in March, which is the  
 27 season of snowmelt (Fig. 5). On the contrary, most of the  $C_{\text{atm}}$ -depleted streams such as Nos.  
 28 29 ( $0.9 \pm 0.3 \mu\text{mol L}^{-1}$ ), 19 ( $0.8 \pm 0.2 \mu\text{mol L}^{-1}$ ), 23 ( $0.5 \pm 0.2 \mu\text{mol L}^{-1}$ ), and 30 ( $0.6 \pm 0.2$   
 29  $\mu\text{mol L}^{-1}$ ) originated from low elevations having urban and sub-urban catchment areas (Table  
 30 1). As a result, the concentrated release of stored  $\text{NO}_3^-_{\text{atm}}$  in the snowpack to the forest floor  
 31 in the catchment zone during the melting seasons is strongly responsible for the  $C_{\text{atm}}$



1 enrichment for some of the streams, particularly that in the streams during March as presented  
2 in Fig. 1.

3 The only exception is stream No. 21, located in the southernmost part of the watershed, which  
4 showed a high annual average  $C_{\text{atm}}$  of  $4.2 \pm 0.8 \mu\text{mol L}^{-1}$ . This small stream originated from a  
5 low elevation of about 200 m having a small catchment area of  $4 \text{ km}^2$ . In addition, although  
6 the other  $C_{\text{atm}}$ -enriched streams showed the maximum  $C_{\text{atm}}$  in March, that in No. 21 was  
7 highest in August, showing extraordinarily high  $C_{\text{atm}}$  of more than  $10 \mu\text{mol L}^{-1}$ . It is unlikely  
8 that the  $\text{NO}_3^-$  stored in the snowpack in winter was the major source of  $\text{NO}_3^-$  in this  
9 stream.

10 The catchment zone of stream No. 21 showed the highest population density within the  
11 catchments of the streams studied (Table 1). About one-third of the catchment includes  
12 residential areas. Artificial drainage systems in urban or residential areas and agricultural  
13 lands in humid temperate regions are usually designed to drain rainwater efficiently into  
14 streams (Takimoto et al. 1994). As a result, a significant portion of  $\text{NO}_3^-$  deposited into the  
15 catchment area was deposited onto paved surfaces and was then drained directly into the  
16 stream via storm sewers without penetrating the ground. Thus, no interaction occurred with  
17 soils, as presented in Fig. 1. Because biogeochemical interactions within soils are the major  
18 sink for  $\text{NO}_3^-$  and thus for  $^{17}\text{O}$  anomalies of nitrate (Nakagawa et al. 2013; Tsunogai et al.  
19 2014), the development of such sewage systems in urban/suburban areas is strongly  
20 responsible for the high  $C_{\text{atm}}$  in stream No. 21. Similar bypassing effects of  $\text{NO}_3^-$  from soil  
21 contacts by paved surfaces have been suggested in urban/suburban watersheds by using  $\delta^{18}\text{O}$   
22 values of nitrate as tracers (Burns et al. 2009; Kaushal et al. 2011). We further verified that  
23 the sewage systems in urban/suburban catchments changed the fate of the  $\text{NO}_3^-$  deposited  
24 onto land to some extent.

25 The observed uniform  $C_{\text{atm}}$  irrespective of population densities and headwater elevations  
26 shown in Fig. 7 implies that the influences of snow packs and paved surfaces were still minor  
27 in determining the  $C_{\text{atm}}$  values in the streams. Rather, the observed stable  $C_{\text{atm}}$  implies that  
28 most of  $\text{NO}_3^-$  in the streams had been stored in groundwater/subsurface runoff in the  
29 watershed having similar  $C_{\text{atm}}$  concentrations and then gushed to the surface at respective  
30 headwater zones of various elevations and various land uses as presented in Fig. 1.

31 When using the  $\delta^{18}\text{O}$  tracer, it was difficult to determine the precise absolute concentration of  
32  $\text{NO}_3^-$  ( $C_{\text{atm}}$ ) in each stream water as presented in this study and to determine whether the



1 absolute concentration of  $\text{NO}_3^-_{\text{atm}}$  was stable among the streams. By using the  $\Delta^{17}\text{O}$  values,  
 2 however, we can determine the precise  $C_{\text{atm}}$  in each stream for each season; thus, we can  
 3 clarify the fate of  $\text{NO}_3^-_{\text{atm}}$ .

### 4 3.7 Differences in outflows from inflows

5 The concentrations and  $\delta^{15}\text{N}$ ,  $\delta^{18}\text{O}$ , and  $\Delta^{17}\text{O}$  values of nitrate in the outflow (Seta River; No.  
 6 33) are also presented in Fig. 4. In a manner similar to the inflow streams (i.e. by using Eqs.  
 7 (3) to (5)), we estimated the annual average concentration of total nitrate in the outflow river ( $\bar{C}_{\text{total}}$ )  
 8 to be  $13.3 \mu\text{mol L}^{-1}$ , the annual average  $\delta^{15}\text{N}$  values ( $\overline{\delta^{15}\text{N}}$ ) to be  $+13.1\text{‰}$ , the annual  
 9 average  $\delta^{18}\text{O}$  values ( $\overline{\delta^{18}\text{O}}$ ) to be  $+1.5\text{‰}$ , and the annual average  $\Delta^{17}\text{O}$  values ( $\overline{\Delta^{17}\text{O}}$ ) to be  
 10  $+0.9\text{‰}$ , as presented in Fig. 4. Moreover, in a manner similar to that used for the inflow  
 11 streams (i.e. by using Eqs. (2), (6), and (7)), we estimated the annual average concentration of  
 12  $\text{NO}_3^-_{\text{atm}}$  in the outflow river ( $\bar{C}_{\text{atm}}$ ) to be  $0.4 \pm 0.1 \mu\text{mol L}^{-1}$ , the annual average  $\delta^{15}\text{N}_{\text{re}}$  values ( $\overline{\delta^{15}\text{N}_{\text{re}}}$ )  
 13 to be  $+13.7 \pm 0.2\text{‰}$ , and the annual average  $\delta^{18}\text{O}_{\text{re}}$  values ( $\overline{\delta^{18}\text{O}_{\text{re}}}$ ) to be  $-1.2 \pm 0.6\text{‰}$ ,  
 14 as presented in Fig. 5. Similar to that for inflows, the  $\Delta^{17}\text{O}$  values were typical for nitrate in  
 15 the natural stream waters. The striking features of the outflow in comparison with the inflows  
 16 were the depletions of both  $C_{\text{total}}$  and  $C_{\text{atm}}$  as well as the  $^{15}\text{N}$  enrichment in the outflow  
 17 compared with that in the inflow (Figs. 4 and 5). Because the denitrification/assimilation  
 18 processes remove both nitrate and  $\text{NO}_3^-_{\text{atm}}$  and preferentially consumes  $^{14}\text{N}$  during the  
 19 removal, the progress of denitrification/assimilation in the lake water column can be strongly  
 20 responsible for the removal of both nitrate and  $\text{NO}_3^-_{\text{atm}}$ , as well as the  $^{15}\text{N}$  enrichment of  
 21 nitrate in the outflow compared with the inflow. If this were the case in Lake Biwa, the total  
 22 nitrate efflux must have been smaller than the total nitrate influx. To quantitatively verify this  
 23 hypothesis and to evaluate the influences of the stagnated flow into the lake on nitrate, we  
 24 estimated the total influx through all of the inflow streams for nitrate and  $\text{NO}_3^-_{\text{atm}}$ ,  $\Delta N_{\text{in}}$ , and  
 25  $\Delta A_{\text{in}}$ , respectively, and the total efflux for nitrate and  $\text{NO}_3^-_{\text{atm}}$ ,  $\Delta N_{\text{out}}$ , and  $\Delta A_{\text{out}}$ , respectively,  
 26 as well as the flow-weighted average  $\delta^{15}\text{N}$ ,  $\delta^{18}\text{O}$ , and  $\Delta^{17}\text{O}$  values of all inflows and outflows,  
 27 to discuss their changes in the lake.

28 The  $\Delta N_{\text{in}}$  and  $\Delta A_{\text{in}}$  in each interval between the observation  $n$  and the next observation  $n + 1$   
 29 (i.e. each season) and the flow-weighted average  $\delta^{15}\text{N}$ ,  $\delta^{18}\text{O}$ , and  $\Delta^{17}\text{O}$  values of the inflows  
 30 ( $\delta(n)$ ) during each interval between the observation  $n$  and the next observation  $n + 1$  were  
 31 determined by using the following equations:



$$\alpha = \frac{Q_{in}}{\sum_i q_i}, \quad (9)$$

$$\Delta N_{in}(n) = \sum_i C_i \cdot f_i \cdot \Delta t_i \cdot \alpha, \quad (10)$$

$$\delta(n) = \frac{\sum_i \delta_i \cdot C_i \cdot f_i \cdot \Delta t_i}{\sum_i C_i \cdot f_i \cdot \Delta t_i}, \quad (11)$$

$$\Delta A_{in}(n) = \Delta N_{in}(n) \cdot \frac{\Delta^{17}O_{in}(n)}{\Delta^{17}O_{atm}}, \quad (12)$$

$$\Delta N_{in} = \sum_{n=1}^4 \Delta N_{in}(n), \quad (13)$$

$$\Delta A_{in} = \sum_{n=1}^4 \Delta A_{in}(n), \quad (14)$$

$$\delta = \frac{\sum_{n=1}^4 \delta(n) \cdot \Delta N_{in}(n)}{\sum_{n=1}^4 \Delta N_{in}(n)}, \quad (15)$$

where  $Q_{in}$  denotes the annual gross influx of water into the lake;  $C_i$  and  $\delta_i$  denote the concentration and isotopic values ( $\delta^{15}N$ ,  $\delta^{18}O$ , or  $\Delta^{17}O$ ) of nitrate on each stream  $i$  during each observation  $n$ , respectively;  $f_i$  denotes the flow rate of each stream  $i$  during each observation  $n$ ; and  $\Delta t_n$  denotes the time interval between the observation  $n$  and the next observation  $n + 1$ .

For  $Q_{in}$ , we used the annual influx of water estimated by Kunimatsu et al. (1995), in which the influx via streams and that via groundwater were included. To include the influx of nitrate via groundwater and the other minor streams not measured in this study during the calculations, we used the correction factor  $\alpha$  in Eq. (9), whereby we assumed that both the average concentration and average isotopic compositions of the inflows determined in this study represented those of all inflows into the lake, while assuming an error range of 20% on  $\alpha$ .

By using the aforementioned equations, we estimated the total influx of nitrate to the lake ( $\Delta N_{in}$ ) for each interval, together with the average  $\delta^{15}N$ ,  $\delta^{18}O$ , and  $\Delta^{17}O$  values of nitrate during each interval, as presented in Table 2. Moreover, by using the values of  $\Delta N_{in}$  during each interval, as well as their  $\delta^{15}N$ ,  $\delta^{18}O$ , and  $\Delta^{17}O$  values, we estimated the total influx of  $NO_3^-$  to the lake ( $\Delta A_{in}$ ) and their average  $\delta^{15}N_{re}$  and  $\delta^{18}O_{re}$  values for each interval, as



presented in Table 2, by using Eqs. (12), (6), and (7). Furthermore, we estimated the annual total influx and their annual average values, as shown in Table 2.

The estimated annual average  $\Delta^{17}\text{O}$  value of inflows,  $+1.3\text{‰}$ , corresponded to the average mixing ratio of  $\text{NO}_3^-_{\text{atm}}$  within total nitrate was  $5.1 \pm 0.5\%$ . We concluded that about 5% of the total nitrate in the inflows originated directly from the atmosphere; therefore, the remainder of the nitrate was of remineralized origin ( $\text{NO}_3^-_{\text{re}}$ ) likely produced through nitrification within the catchments, as discussed in section 3.4. In addition, we estimated the annual total influx of nitrate to the lake ( $\Delta\text{N}_{\text{in}}$ ) to be  $199 \pm 40$  Mmol and that of  $\text{NO}_3^-_{\text{atm}}$  ( $\Delta\text{A}_{\text{in}}$ ) to be  $10.1 \pm 2.0$  Mmol.

Moreover, we estimated the total efflux of nitrate from the lake via the outflows ( $\Delta\text{N}_{\text{out}}$ ) and that of  $\text{NO}_3^-_{\text{atm}}$  ( $\Delta\text{A}_{\text{in}}$ ) for each interval by using Eqs. (9) to (15) in which  $\Delta\text{N}_{\text{in}}$  was replaced with  $\Delta\text{N}_{\text{out}}$ , which is the gross efflux of nitrate from the lake via the streams and groundwater during the interval between the observation  $n$  and the next observation  $n + 1$ . Additionally,  $Q_{\text{in}}$  was replaced with  $Q_{\text{out}}$ , which is the annual gross efflux of water. To include the minor efflux of nitrate to  $\Delta\text{N}_{\text{out}}$ , such as that via canals, we used the correction factor  $\gamma$  instead of  $\alpha$  in Eqs. (9) and (10), whereby we assumed that both the concentration and isotopic compositions of the natural outflow determined for each season in this study represented all outflows. For  $Q_{\text{out}}$ , we used the annual efflux of water from Lake Biwa estimated by Kunimatsu et al. (1995), which included the efflux via a natural river (Seta River, No. 33) and that via canals.

Compared with the annual  $\Delta\text{N}_{\text{in}}$ ,  $199 \pm 40$  Mmol, and annual  $\Delta\text{A}_{\text{in}}$ ,  $10.1 \pm 2.0$  Mmol, both the annual  $\Delta\text{N}_{\text{out}}$ ,  $67 \pm 13$  Mmol, and annual  $\Delta\text{A}_{\text{out}}$ ,  $2.2 \pm 0.4$  Mmol, were significantly smaller by about 34% and 22%, respectively. Hence, Lake Biwa acts as a net sink for both nitrate and  $\text{NO}_3^-_{\text{atm}}$ , as previously implied from the  $^{15}\text{N}$  enrichment in outflows. Considering that nitrate occupied about 70% of the total fixed N pool in the inflows and about 40% of the total fixed N pool in the outflows (Shiga\_Prefecture 2015), Lake Biwa also acts as a net sink for fixed N. Similar results had been obtained in past studies that discussed fixed N input/output of the lake (Kunimatsu 1995; Tezuka 1985; Tezuka 1992; Yamada et al. 1996). As implied in the significant  $^{15}\text{N}$  enrichment in the remineralized portion of nitrate ( $\delta^{15}\text{N}_{\text{re}}$ ) in the outflow,  $+13.7 \pm 0.2\text{‰}$ , compared to that in the inflow,  $+5.6 \pm 0.3\text{‰}$ , partial removal of nitrate through either assimilation or denitrification to result in  $^{15}\text{N}$  enrichment of residual nitrate is strongly responsible for the  $8.1 \pm 0.5\text{‰}$  increase in  $\delta^{15}\text{N}_{\text{re}}$ , as well as the net removal of both nitrate and  $\text{NO}_3^-_{\text{atm}}$  from the lake.

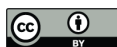

1 On the contrary, the  $\delta^{18}\text{O}$  differences in the remineralized portion of nitrate ( $\delta^{18}\text{O}_{\text{re}}$ ) between  
 2 the inflows and outflows were significantly smaller than  $\delta^{15}\text{N}_{\text{re}}$ , at an annual average of only  
 3  $1.6 \pm 1.5\text{‰}$  (Table 2). If nitrate in outflows is the residual of assimilation/denitrification in the  
 4 lake,  $\delta^{18}\text{O}_{\text{re}}$  should increase as well (Granger et al. 2008; Granger et al. 2004). The much  
 5 smaller  $\delta^{18}\text{O}_{\text{re}}$  difference implies that nitrate supplied directly from inflows occupied a small  
 6 portion of nitrate in the outflows and that most of nitrate with high  $\delta^{15}\text{N}$  values in the outflows  
 7 had been produced through nitrification in the lake water column in which the fixed N had  
 8 previously been enriched in  $^{15}\text{N}$ . Isotopic fractionations during fixed N cycling in the lake  
 9 such as denitrification or assimilation and the subsequent removal of  $^{15}\text{N}$ -depleted organic N  
 10 during sedimentation (Fig. 1) should be responsible for the  $^{15}\text{N}$  enrichment of the total fixed N.  
 11 That is, most of nitrate fed into the lake via the inflows had been removed at least once from  
 12 the lake water column and been involved into the total fixed N cycling in the lake, in which  
 13 the  $^{15}\text{N}$ -enriched nitrate in the outflow had been produced (Fig. 1). The stagnation of flow in  
 14 the lake encouraged primary production and thus the net removal of total fixed N through  
 15 either denitrification or sedimentation, which resulted in  $^{15}\text{N}$  enrichment of total fixed N pool  
 16 compared with that in the inflows. Further studies on N cycling in the lake are needed to  
 17 verify these results.

18

#### 19 **4 Concluding Remarks**

20 In this study, we applied the  $\Delta^{17}\text{O}$  tracer of nitrate to determine accurate and precise mixing  
 21 ratios of unprocessed  $\text{NO}_3^-_{\text{atm}}$  within the total nitrate value for more than 30 streams in the  
 22 Lake Biwa watershed basin. Although the nitrate concentration changed from 12.7 to 106.2  
 23  $\mu\text{mol L}^{-1}$  between the inflow streams and the mixing ratio of  $\text{NO}_3^-_{\text{atm}}$  within total nitrate also  
 24 changed from 1.8% to 11.8%, the absolute concentration of  $\text{NO}_3^-_{\text{atm}}$  ( $C_{\text{atm}}$ ) in each stream  
 25 water was almost stable at  $2.3 \pm 1.1 \mu\text{mol L}^{-1}$  irrespective of the changes in population  
 26 density and land use among the catchment areas. We concluded that changes in population  
 27 density and land use in each catchment area had little impact on  $C_{\text{atm}}$ , and the total nitrate  
 28 concentration was determined primarily by the extent of the additional  $\text{NO}_3^-_{\text{re}}$  contribution  
 29 mostly from anthropogenic sources. Relying on only the  $\delta^{15}\text{N}$  and  $\delta^{18}\text{O}$  tracers of nitrate, it  
 30 was difficult to determine the precise  $C_{\text{atm}}$  in stream water and whether  $C_{\text{atm}}$  was uniform  
 31 among the streams. By using the  $\Delta^{17}\text{O}$  values, we can estimate accurate and precise  $C_{\text{atm}}$  in



1 each stream for each season; thus, we can clarify the fate of  $\text{NO}_3^-_{\text{atm}}$  deposited into the  
2 catchments.

3 Moreover, additional measurements of the  $\Delta^{17}\text{O}$  values of nitrate together with  $\delta^{15}\text{N}$  and  $\delta^{18}\text{O}$   
4 enabled us to exclude the contribution of  $\text{NO}_3^-_{\text{atm}}$  from the determined  $\delta^{15}\text{N}$  and  $\delta^{18}\text{O}$  values  
5 and to use the corrected  $\delta^{15}\text{N}$  and  $\delta^{18}\text{O}$  values,  $\delta^{15}\text{N}_{\text{re}}$  and  $\delta^{18}\text{O}_{\text{re}}$ , to evaluate the source and  
6 behaviour of  $\text{NO}_3^-_{\text{re}}$  in each stream. Based on the correction, we successfully estimated the  
7  $\delta^{15}\text{N}$  and  $\delta^{18}\text{O}$  values of  $\text{NO}_3^-_{\text{re}}$  in the streams to be  $+4.4 \pm 1.8\text{‰}$  and  $-2.3 \pm 0.9\text{‰}$ ,  
8 respectively, for that produced through nitrification in naturally occurring soil organic matter  
9 and  $+9.2 \pm 1.3\text{‰}$  and  $-2.2 \pm 1.1\text{‰}$ , respectively, for that supplied from anthropogenic  
10 sources, most of which had been occupied by sewage effluent. In addition, the low and  
11 uniform annual average  $\delta^{18}\text{O}_{\text{re}}$  values of  $\text{NO}_3^-_{\text{re}}$  in the streams implies that the denitrification  
12 in the riverbed sediments was minor in the streams.

13 Furthermore, we clarified the seasonal changes in the range of isotopic fractionation through  
14 partial nitrate removal via assimilation or denitrification by using the relationship between  
15  $\Delta^{17}\text{O}$  and  $\delta^{18}\text{O}$  of nitrate in the streams. The changes were small in winter in all of the  
16 catchment area but large in summer in some catchments. Therefore, the relationship between  
17  $\Delta^{17}\text{O}$  and  $\delta^{18}\text{O}$  of nitrate eluted from a catchment area is a powerful indicator for evaluating  
18 the biogeochemical nitrogen cycles within a catchment area, including the seasonal changes.

19 In summary, interpretations on the stable isotopic compositions of nitrate ( $\delta^{15}\text{N}$  and  $\delta^{18}\text{O}$ )  
20 without  $\Delta^{17}\text{O}$  values can be often misleading when assuming (1)  $\delta^{18}\text{O}$  values simply reflect  
21 the mixing ratio of  $\text{NO}_3^-_{\text{atm}}$  within total nitrate, (2) the mixing ratios of  $\text{NO}_3^-_{\text{atm}}$  within the  
22 total  $\text{NO}_3^-$  is minimum for whole/specific samples studied, or (3) the mixing ratio of  $\text{NO}_3^-_{\text{atm}}$   
23 within total nitrate is uniform in whole/specific samples studied. In using the stable isotopic  
24 compositions of nitrate in freshwater environments to trace the source and fate of the nitrate,  
25 particularly the  $\delta^{18}\text{O}$  value, determination of the  $\Delta^{17}\text{O}$  values is essential.

26

## 27 Acknowledgements

28 We are grateful to Kosuke Ikeya, Hiroki Sakuma, Sho Minami, Kenta Ando, Shuichi Hara,  
29 Toshiyuki Matsushita, Takahiro Mihara, Teresa Fukuda, Yoshiumi Matsumoto, Rei Nakane,  
30 Lin Cheng, Yuuko Nakano, and other present and past members of the Biogeochemistry  
31 Group, Nagoya University, for their valuable support throughout this study. We thank Drs.



1 Shin-ichi Nakano, Tadatoshi Koitatabashi, Yukiko Goda, and other staff of the Center for  
2 Ecological Research, Kyoto University, for their valuable support during the field study in the  
3 Lake Biwa watershed basin. We also thank the members of the Machine Shop of Nagoya  
4 University Technical Center for their valuable support in developing the sampling and  
5 analytical devices used in this study. This work is supported by a Grant-in-Aid for Scientific  
6 Research from the Ministry of Education, Culture, Sports, Science, and Technology of Japan  
7 under grant numbers 24651002, 26241006, and 15H02804.

8

## 9 References

- 10 Alexander, B., M. G. Hastings, D. J. Allan, J. Dachas, J. A. Thornton, and S. A. Kunasek.  
11 2009. Quantifying atmospheric nitrate formation pathways based on a global model of the  
12 oxygen isotopic composition ( $\delta$  O-17) of atmospheric nitrate. *Atmos. Chem. Phys.* **9**:  
13 5043-5056.
- 14 Aravena, R., M. L. Evans, and J. A. Cherry. 1993. Stable Isotopes of Oxygen and Nitrogen in  
15 Source Identification of Nitrate from Septic Systems. *Groundwater* **31**: 180-186.
- 16 Barnes, R., P. Raymond, and K. Casciotti. 2008. Dual isotope analyses indicate efficient  
17 processing of atmospheric nitrate by forested watersheds in the northeastern U.S.  
18 *Biogeochemistry* **90**: 15-27.
- 19 Barnes, R., and P. A. Raymond. 2010. Land-use controls on sources and processing of nitrate  
20 in small watersheds: insights from dual isotopic analysis. *Ecol. Appl.* **20**: 1961-1978.
- 21 Böttcher, J., O. Strebel, S. Voerkelius, and H. L. Schmidt. 1990. Using Isotope Fractionation  
22 of Nitrate Nitrogen and Nitrate Oxygen for Evaluation of Microbial Denitrification in a Sandy  
23 Aquifer. *J. Hydrol.* **114**: 413-424.
- 24 Buchwald, C., A. E. Santoro, M. R. Mcilvin, and K. L. Casciotti. 2012. Oxygen isotopic  
25 composition of nitrate and nitrite produced by nitrifying cocultures and natural marine  
26 assemblages. *Limnol. Oceanogr.* **57**: 1361-1375.
- 27 Burns, D. A., E. W. Boyer, E. M. Elliott, and C. Kendall. 2009. Sources and transformations  
28 of nitrate from streams draining varying land uses: Evidence from dual isotope analysis.  
29 *Journal of Environmental Quality* **38**: 1149-1159.



- 1 Burns, D. A., and C. Kendall. 2002. Analysis of  $\delta^{15}\text{N}$  and  $\delta^{18}\text{O}$  to differentiate  $\text{NO}_3^-$  sources  
2 in runoff at two watersheds in the Catskill Mountains of New York. *Water Resour. Res.* **38**:  
3 1051, doi:10.1029/2001WR000292.
- 4 Campbell, D. H., C. Kendall, C. C. Y. Chang, S. R. Silva, and K. A. Tonnessen. 2002.  
5 Pathways for nitrate release from an alpine watershed: Determination using  $\delta^{15}\text{N}$  and  $\delta^{18}\text{O}$ .  
6 *Water Resour. Res.* **38**: 1052, doi:10.1029/2001WR000294.
- 7 Campbell, J. L., M. J. Mitchell, and B. Mayer. 2006. Isotopic assessment of  $\text{NO}_3^-$  and  $\text{SO}_4^{2-}$   
8 mobility during winter in two adjacent watersheds in the Adirondack Mountains, New York.  
9 *Journal of Geophysical Research* **111**: G04007, doi: 04010.01029/02006JG000208.
- 10 Costa, A. W., G. Michalski, A. J. Schauer, B. Alexander, E. J. Steig, and P. B. Shepson. 2011.  
11 Analysis of atmospheric inputs of nitrate to a temperate forest ecosystem from  $\Delta^{17}\text{O}$  isotope  
12 ratio measurements. *Geophys. Res. Lett.* **38**: L15805, doi: 10.1029/2011GL047539.
- 13 Curtis, C. J., C. D. Evans, C. L. Goodale, and T. H. E. Heaton. 2011. What have stable  
14 isotope studies revealed about the nature and mechanisms of N saturation and nitrate leaching  
15 from semi-natural catchments ? *Ecosystems* **14**: 1021-1037.
- 16 Dehwakh, N. R., T. Meixner, G. Michalski, and J. McIntosh. 2012. Using  $^{17}\text{O}$  to investigate  
17 nitrate sources and sinks in a semi-arid groundwater system. *Environ. Sci. Technol.* **46**: 745-  
18 751.
- 19 Durka, W., E.-D. Schulze, G. Gebauer, and S. Voerkeliust. 1994. Effects of forest decline on  
20 uptake and leaching of deposited nitrate determined from  $^{15}\text{N}$  and  $^{18}\text{O}$  measurements. *Nature*  
21 **372**: 765-767.
- 22 EANET. 2014. Data Report 2013. Network center for EANET (Acid Deposition Monitoring  
23 Network in East Asia), Nigata, Japan, 298 pp.
- 24 Fang, Y., K. Koba, A. Makabe, F. Zhu, S. Fan, X. Liu, and M. Yoh. 2012. Low delta O-18  
25 Values of Nitrate Produced from Nitrification in Temperate Forest Soils. *Environ. Sci.*  
26 *Technol.* **46**: 8723-8730.
- 27 Granger, J., D. M. Sigman, M. F. Lehmann, and P. D. Tortell. 2008. Nitrogen and oxygen  
28 isotope fractionation during dissimilatory nitrate reduction by denitrifying bacteria. *Limnol.*  
29 *Oceanogr.* **53**: 2533-2545.



- 1 Granger, J., D. M. Sigman, J. A. Needoba, and P. J. Harrison. 2004. Coupled nitrogen and  
2 oxygen isotope fractionation of nitrate during assimilation by cultures of marine  
3 phytoplankton. *Limnol. Oceanogr.* **49**: 1763-1773.
- 4 Granger, J., D. M. Sigman, M. M. Rohde, M. T. Maldonado, and P. D. Tortell. 2010. N and O  
5 isotope effects during nitrate assimilation by unicellular prokaryotic and eukaryotic plankton  
6 cultures. *Geochim. Cosmochim. Acta* **74**: 1030-1040.
- 7 Hales, H. C., D. S. Ross, and A. Lini. 2007. Isotopic signature of nitrate in two contrasting  
8 watersheds of Brush Brook, Vermont, USA. *Biogeochemistry* **84**: 51-66.
- 9 Hirota, A., U. Tsunogai, D. D. Komatsu, and F. Nakagawa. 2010. Simultaneous determination  
10 of  $\delta^{15}\text{N}$  and  $\delta^{18}\text{O}$  of  $\text{N}_2\text{O}$  and  $\delta^{13}\text{C}$  of  $\text{CH}_4$  in nanomolar quantities from a single water sample.  
11 *Rapid Commun. Mass Spectrom.* **24**: 1085-1092.
- 12 Hsieh, C. H., Y. Sakai, S. Ban, K. Ishikawa, T. Ishikawa, S. Ichise, N. Yamamura, and M.  
13 Kumagai. 2011. Eutrophication and warming effects on long-term variation of zooplankton in  
14 Lake Biwa. *Biogeosciences* **8**: 1383-1399.
- 15 Johannsen, A., K. Dähnke, and K. Emeis. 2008. Isotopic composition of nitrate in five  
16 German rivers discharging into the North Sea. *Org. Geochem.* **39**: 1678-1689.
- 17 Kaiser, J., M. G. Hastings, B. Z. Houlton, T. Röckmann, and D. M. Sigman. 2007. Triple  
18 oxygen isotope analysis of nitrate using the denitrifier method and thermal decomposition of  
19  $\text{N}_2\text{O}$ . *Anal. Chem.* **79**: 599-607.
- 20 Kaushal, S. S., P. M. Groffman, L. E. Band, E. M. Elliott, C. A. Shields, and C. Kendall. 2011.  
21 Tracking nonpoint source nitrogen pollution in human-impacted watersheds. *Environ. Sci.*  
22 *Technol.* **45**: 8225-8232.
- 23 Kendall, C. 1998. Tracing Nitrogen Sources and Cycling in Catchments, p. 519-576. In C.  
24 Kendall and J. J. McDonnell [eds.], *Isotope Tracers in Catchment Hydrology*. Elsevier  
25 Science B.V., Amsterdam, 839 p.
- 26 Kendall, C., D. H. Campbell, D. A. Burns, J. B. Schanley, S. R. Silva, and C. C. Y. Chang.  
27 1995. Tracing sources of nitrate in snowmelt runoff using the oxygen and nitrogen isotopic  
28 compositions of nitrate, p. 339-347. *Biogeochemistry of seasonally snow-covered catchments*,  
29 *Proceedings of a Boulder Symposium*. IAHS Publication.



- 1 Komatsu, D. D., T. Ishimura, F. Nakagawa, and U. Tsunogai. 2008. Determination of the  
2  $^{15}\text{N}/^{14}\text{N}$ ,  $^{17}\text{O}/^{16}\text{O}$ , and  $^{18}\text{O}/^{16}\text{O}$  ratios of nitrous oxide by using continuous-flow isotope-ratio  
3 mass spectrometry. *Rapid Commun. Mass Spectrom.* **22**: 1587-1596.
- 4 Konno, U., U. Tsunogai, D. D. Komatsu, S. Daita, F. Nakagawa, A. Tsuda, T. Matsui, Y.-J.  
5 Eum, and K. Suzuki. 2010. Determination of total  $\text{N}_2$  fixation rates in the ocean taking into  
6 account both the particulate and filtrate fractions. *Biogeosciences* **7**: 2369-2377.
- 7 Kunasek, S. A., B. Alexander, E. J. Steig, M. G. Hastings, D. J. Gleason, and J. C. Jarvis.  
8 2008. Measurements and modeling of Delta O-17 of nitrate in snowpits from Summit,  
9 Greenland. *J. Geophys. Res.* **113**: D24302, doi:10.1029/2008jd010103.
- 10 Kunimatsu, T. 1995. Mass balance of Lake Biwa. *LBRI bulletin* **12**: 68-73 (in Japanese).
- 11 Likens, G. E., F. H. Bormann, N. M. Johnson, D. W. Fisher, and R. S. Pierce. 1970. Effects of  
12 forest cutting and herbicide treatment on nutrient budgets in the Hubbard Brook watershed-  
13 ecosystem. *Ecol. Monogr.* **40**: 23-47.
- 14 Liu, T., F. Wang, G. Michalski, X. Xia, and S. Liu. 2013. Using N-15, O-17, and O-18 To  
15 Determine Nitrate Sources in the Yellow River, China. *Environmental Science & Technology*  
16 **47**: 13412-13421.
- 17 Lohse, K. A., J. Sanderman, and R. Amundson. 2013. Identifying sources and processes  
18 influencing nitrogen export to a small stream using dual isotopes of nitrate. *Water Resour.*  
19 *Res.* **49**: 5715–5731.
- 20 Mayer, B., S. M. Bollwerk, T. Mansfeldt, B. Huter, and J. Veizer. 2001. The oxygen isotope  
21 composition of nitrate generated by nitrification in acid forest floors. *Geochim. Cosmochim.*  
22 *Acta* **65**: 2743-2756.
- 23 Mayer, B., E. W. Boyer, C. Goodale, N. A. Jaworski, N. Van Breemen, R. W. Howarth, S.  
24 Seitzinger, G. Billen, L. J. Lajtha, M. Nosal, and K. Paustian. 2002. Sources of nitrate in  
25 rivers draining sixteen watersheds in the northeastern US: Isotopic constraints.  
26 *Biogeochemistry* **57**: 171-197.
- 27 Mcilvin, M. R., and M. A. Altabet. 2005. Chemical conversion of nitrate and nitrite to nitrous  
28 oxide for nitrogen and oxygen isotope analysis in freshwater and seawater. *Anal. Chem.* **77**:  
29 5589-5595.



- 1 McIsaac, G. F., M. B. David, G. Z. Gertner, and D. A. Goolsby. 2001. Eutrophication: Nitrate  
2 flux in the Mississippi River. *Nature* **414**: 166-167.
- 3 McMahon, P. B., and J. K. Böhlke. 1996. Denitrification and mixing in a stream-aquifer  
4 system: Effects on nitrate loading to surface water. *J. Hydrol.* **186**: 105-128.
- 5 Michalski, G., T. Meixner, M. Fenn, L. Hernandez, A. Sirulnik, E. Allen, and M. Thiemens.  
6 2004. Tracing Atmospheric Nitrate Deposition in a Complex Semiarid Ecosystem Using  $\Delta^{17}\text{O}$ .  
7 *Environ. Sci. Technol.* **38**: 2175-2181.
- 8 Michalski, G., J. Savarino, J. K. Böhlke, and M. Thiemens. 2002. Determination of the total  
9 oxygen isotopic composition of nitrate and the calibration of a  $\Delta^{17}\text{O}$  nitrate reference material.  
10 *Anal. Chem.* **74**: 4989-4993.
- 11 Michalski, G., Z. Scott, M. Kabilig, and M. H. Thiemens. 2003. First measurements and  
12 modeling of  $\Delta^{17}\text{O}$  in atmospheric nitrate. *Geophys. Res. Lett.* **30**: 1870,  
13 doi:10.1029/2003GL017015.
- 14 Miller, M. F. 2002. Isotopic fractionation and the quantification of  $^{17}\text{O}$  anomalies in the  
15 oxygen three-isotope system: an appraisal and geochemical significance. *Geochim.*  
16 *Cosmochim. Acta* **66**: 1881-1889.
- 17 Morin, S., J. Erbland, J. Savarino, F. Domine, J. Bock, U. Friess, H.-W. Jacobi, H. Sihler, and  
18 J. M. F. Martins. 2012. An isotopic view on the connection between photolytic emissions of  
19  $\text{NO}_x$  from the Arctic snowpack and its oxidation by reactive halogens. *J. Geophys. Res.* **117**:  
20 D00R08, doi:10.1029/2011JD016618.
- 21 Morin, S., J. Savarino, M. M. Frey, F. Domine, H. W. Jacobi, L. Kaleschke, and J. M. F.  
22 Martins. 2009. Comprehensive isotopic composition of atmospheric nitrate in the Atlantic  
23 Ocean boundary layer from 65 degrees S to 79 degrees N. *J. Geophys. Res.* **114**: D05303, doi:  
24 10.1029/2008jd010696.
- 25 Morin, S., J. Savarino, M. M. Frey, N. Yan, S. Bekki, J. W. Bottenheim, and J. M. F. Martins.  
26 2008. Tracing the origin and fate of  $\text{NO}_x$  in the Arctic atmosphere using stable isotopes in  
27 nitrate. *Science* **322**: 730-732.
- 28 Nakagawa, F., A. Suzuki, S. Daita, T. Ohyama, D. D. Komatsu, and U. Tsunogai. 2013.  
29 Tracing atmospheric nitrate in groundwater using triple oxygen isotopes: Evaluation based on  
30 bottled drinking water. *Biogeosciences* **10**: 3547-3558.

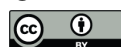

- 1 Nestler, A., M. Berglund, F. Accoe, S. Duta, D. Xue, P. Boeckx, and P. Taylor. 2011.
- 2 Isotopes for improved management of nitrate pollution in aqueous resources: review of
- 3 surface water field studies. *Environmental Science and Pollution Research* **18**: 519-533.
- 4 Ohte, N. 2013. Tracing sources and pathways of dissolved nitrate in forest and river
- 5 ecosystems using high-resolution isotopic techniques: a review. *Ecol. Res.* **28**: 749-757.
- 6 Ohte, N., S. D. Sebestyen, J. B. Shanley, D. H. Doctor, C. Kendall, S. D. Wankel, and E. W.
- 7 Boyer. 2004. Tracing sources of nitrate in snowmelt runoff using a high-resolution isotopic
- 8 technique. *Geophys. Res. Lett.* **31**: L21506, doi:10.1029/2004GL020908.
- 9 Ohte, N., I. Tayasu, A. Kohzu, C. Yoshimizu, K. Osaka, A. Makabe, K. Koba, N. Yoshida,
- 10 and T. Nagata. 2010. Spatial distribution of nitrate sources of rivers in the Lake Biwa
- 11 watershed, Japan: Controlling factors revealed by nitrogen and oxygen isotope values. *Water*
- 12 *Resour. Res.* **46**: W07505, doi:10.1029/2009wr007871.
- 13 Paerl, H. W. 2009. Controlling eutrophication along the freshwater–marine continuum: Dual
- 14 nutrient (N and P) reductions are essential. *Estuar. Coasts* **32**: 593-601.
- 15 Pellerin, B., J. Saraceno, J. Shanley, S. Sebestyen, G. Aiken, W. Wollheim, and B.
- 16 Bergamaschi. 2012. Taking the pulse of snowmelt: in situ sensors reveal seasonal, event and
- 17 diurnal patterns of nitrate and dissolved organic matter variability in an upland forest stream.
- 18 *Biogeochemistry* **108**: 183-198.
- 19 Piatek, K. B., M. J. Mitchell, S. R. Silva, and C. Kendall. 2005. Sources of nitrate in
- 20 snowmelt discharge: evidence from water chemistry and stable isotopes of nitrate. *Water Air*
- 21 *Soil Poll.* **165**: 13-35.
- 22 Riha, K. M., G. Michalski, E. L. Gallo, K. A. Lohse, P. D. Brooks, and T. Meixner. 2014.
- 23 High Atmospheric Nitrate Inputs and Nitrogen Turnover in Semi-arid Urban Catchments.
- 24 *Ecosystems* **17**: 1309-1325.
- 25 Rose, L. A., E. M. Elliott, and M. B. Adams. 2015. Triple Nitrate Isotopes Indicate Differing
- 26 Nitrate Source Contributions to Streams Across a Nitrogen Saturation Gradient. *Ecosystems*
- 27 doi:10.1007/s10021-015-9891-8.
- 28 Savarino, J., S. Morin, J. Erbland, F. Grannec, M. D. Patey, W. Vicars, B. Alexander, and E.
- 29 P. Achterberg. 2013. Isotopic composition of atmospheric nitrate in a tropical marine
- 30 boundary layer. *Proc. Natl. Aca. Sci. USA* **110**: 17668-17673.

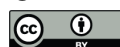

- 1 Shiga Prefecture. 2015. Annual Report on the Environment in Shiga (FY 2013), Appendix.
- 2 Shiga prefecture, Japan, 332 pp (in Japanese).
- 3 Silva, S. R., P. B. Ging, R. W. Lee, J. C. Ebbert, A. J. Tesoriero, and E. L. Inkpen. 2002.
- 4 Forensic applications of nitrogen and oxygen isotopes in tracing nitrate sources in urban
- 5 environments. *Environ. Forensics* **3**: 125-130.
- 6 Spoelstra, J., S. L. Schiff, P. W. Hazlett, D. S. Jeffries, and R. G. Semkin. 2007. The isotopic
- 7 composition of nitrate produced from nitrification in a hardwood forest floor. *Geochim.*
- 8 *Cosmochim. Acta* **71**: 3757-3771.
- 9 Swank, W. T., J. M. Vose, and K. J. Elliott. 2001. Long-term hydrologic and water quality
- 10 responses following commercial clearcutting of mixed hardwoods on a southern Appalachian
- 11 catchment. *Forest Ecol. Manag.* **143**: 163-178.
- 12 Takimoto, H., T. Tanaka, and H. Horino. 1994. Does forest conserve runoff discharge during
- 13 drought ? *Trans. Jpn. Soc. Irrig. Drain. Reclam. Eng.* **170**: 75-81.
- 14 Tezuka, Y. 1985. C:N:P Ratios of Seston in Lake Biwa as Indicators of Nutrient Deficiency in
- 15 Phytoplankton and Decomposition Process of Hypolimnetic Particulate Matter. *Jap. J. Limnol.*
- 16 **46**: 239-246.
- 17 ---. 1992. Recent Trend in the Eutrophication of the North Basin of Lake Biwa. *Jap. J. Limnol.*
- 18 **53**: 139-144.
- 19 Thibodeau, B., J.-F. Hélie, and M. F. Lehmann. 2013. Variations of the nitrate isotopic
- 20 composition in the St. Lawrence River caused by seasonal changes in atmospheric nitrogen
- 21 inputs. *Biogeochemistry* **115**: 287-298.
- 22 Tobari, Y., K. Koba, K. Fukushima, N. Tokuchi, N. Ohte, R. Tateno, S. Toyoda, T. Yoshioka,
- 23 and N. Yoshida. 2010. Contribution of atmospheric nitrate to stream-water nitrate in Japanese
- 24 coniferous forests revealed by the oxygen isotope ratio of nitrate. *Rapid Commun. Mass*
- 25 *Spectrom.* **24**: 1281-1286.
- 26 Tsunogai, U., S. Daita, D. D. Komatsu, F. Nakagawa, and A. Tanaka. 2011. Quantifying
- 27 nitrate dynamics in an oligotrophic lake using  $\Delta^{17}\text{O}$ . *Biogeosciences* **8**: 687-702.
- 28 Tsunogai, U., T. Kido, A. Hirota, S. B. Ohkubo, D. D. Komatsu, and F. Nakagawa. 2008.
- 29 Sensitive determinations of stable nitrogen isotopic composition of organic nitrogen through
- 30 chemical conversion into  $\text{N}_2\text{O}$ . *Rapid Commun. Mass Spectrom.* **22**: 345-354.



- 1 Tsunogai, U., D. D. Komatsu, S. Daita, G. A. Kazemi, F. Nakagawa, I. Noguchi, and J. Zhang.
- 2 2010. Tracing the fate of atmospheric nitrate deposited onto a forest ecosystem in eastern
- 3 Asia using  $\Delta^{17}\text{O}$ . *Atmos. Chem. Phys.* **10**: 1809-1820.
- 4 Tsunogai, U., D. D. Komatsu, T. Ohyama, A. Suzuki, F. Nakagawa, I. Noguchi, K. Takagi, M.
- 5 Nomura, K. Fukuzawa, and H. Shibata. 2014. Quantifying the effects of clear-cutting and
- 6 strip-cutting on nitrate dynamics in a forested watershed using triple oxygen isotopes as
- 7 tracers. *Biogeosciences* **11**: 5411-5424.
- 8 Wankel, S. D., C. Kendall, C. A. Francis, and A. Paytan. 2006. Nitrogen sources and cycling
- 9 in the San Francisco Bay Estuary: A nitrate dual isotopic composition approach. *Limnol.*
- 10 *Oceanogr.* **51**: 1654-1664.
- 11 Widory, D., E. Petelet-Giraud, P. Négrel, and B. Ladouche. 2005. Tracking the Sources of
- 12 Nitrate in Groundwater Using Coupled Nitrogen and Boron Isotopes: A Synthesis.
- 13 *Environmental Science & Technology* **39**: 539-548.
- 14 Williard, K. W. J., D. R. Dewalle, P. J. Edwards, and W. E. Sharpe. 2001.  $^{18}\text{O}$  isotopic
- 15 separation of stream nitrate sources in mid-Appalachian forested watersheds. *J. Hydrol.* **252**:
- 16 174-188.
- 17 Xue, D. M., J. Botte, B. De Baets, F. Accoe, A. Nestler, P. Taylor, O. Van Cleemput, M.
- 18 Berglund, and P. Boeckx. 2009. Present limitations and future prospects of stable isotope
- 19 methods for nitrate source identification in surface- and groundwater. *Water Res.* **43**: 1159-
- 20 1170.
- 21 Yamada, Y., T. Ueda, and E. Wada. 1996. Distribution of Carbon and Nitrogen Isotope Ratios
- 22 in the Yodo River Watershed. *Jap. J. Limnol.* **57**: 467-477.
- 23 Yamazaki, A., T. Watanabe, and U. Tsunogai. 2011. Nitrogen isotopes of organic nitrogen in
- 24 reef coral skeletons as a proxy of tropical nutrient dynamics. *Geophys. Res. Lett.* **38**: L19605,
- 25 doi:10.1029/2011GL049053.
- 26 Yue, F.-J., S.-L. Li, Z.-Q. Zhao, and J. Hu. 2013. Using dual isotopes to evaluate sources and
- 27 transformation of nitrogen in the Liao River, northeast China. *Appl. Geochem.* **36**: 1-9.
- 28 Zeng, H., and J. Wu. 2015. Tracing the Nitrate Sources of the Yili River in the Taihu
- 29 Lake Watershed: A Dual Isotope Approach. *Water* **7**: 188-201.
- 30



1 Table 1 List of studied streams.

| No.           | Name    | Loc. # | Basin Area*<br>(km <sup>2</sup> ) | Population Density*<br>(km <sup>-2</sup> ) | Residential*<br>(%) | No.            | Name     | Loc. # | Basin Area*<br>(km <sup>2</sup> ) | Population Density*<br>(km <sup>-2</sup> ) | Residential*<br>(%) |
|---------------|---------|--------|-----------------------------------|--------------------------------------------|---------------------|----------------|----------|--------|-----------------------------------|--------------------------------------------|---------------------|
| <b>Inflow</b> |         |        |                                   |                                            |                     | 14             | Seri     | East   | 74                                | 462                                        | 8.1                 |
| 31            | Tenjin  | West   | 10                                | 539                                        | 7.3                 | 15             | Inukami  | East   | 102                               | 109                                        | 2.8                 |
| 30            | Mano    | West   | 23                                | 1048                                       | 15.6                | 16             | Ajiki    | East   | 15                                | 1002                                       | 20.1                |
| 29            | Wani    | West   | 17                                | 186                                        | 5.4                 | 17             | Uso      | East   | 84                                | 411                                        | 11.0                |
| 28            | U       | West   | 7                                 | 66                                         | 0.8                 | 18             | Bunroku  | East   | 14                                | 595                                        | 11.7                |
| 1             | Kamo    | West   | 47                                | 89                                         | 1.2                 | 19             | Nomazu   | East   | 7                                 | 758                                        | 20.2                |
| 2             | Ado     | West   | 306                               | 27                                         | 0.7                 | 20             | Echi     | East   | 211                               | 110                                        | 2.5                 |
| 3             | Ishida  | North  | 60                                | 84                                         | 2.0                 | 27             | Hino     | South  | 226                               | 338                                        | 8.4                 |
| 4             | Momose  | North  | 13                                | 65                                         | 0.6                 | 26             | Yanomune | South  | 42                                | 859                                        | 15.7                |
| 5             | Chinai  | North  | 51                                | 44                                         | 1.8                 | 25             | Yasu     | South  | 391                               | 324                                        | 6.5                 |
| 6             | Ohura   | North  | 39                                | 98                                         | 2.7                 | 24             | Yamaga   | South  | 6                                 | 2540                                       | 33.7                |
| 7             | Oh      | North  | 20                                | 55                                         | 1.6                 | 23             | Sakai    | South  | 2                                 | 979                                        | 27.7                |
| 8             | Yogo    | North  | 7                                 | 141                                        | 3.4                 | 22             | Hayama   | South  | 34                                | 2048                                       | 29.7                |
| 9             | Chonoki | North  | 10                                | 412                                        | 13.5                | 34             | Kusatsu  | South  | 48                                | 370                                        | 30.6                |
| 10            | Ta      | North  | 36                                | 301                                        | 9.6                 | 21             | Nagaso   | South  | 4                                 | 3174                                       | 31.4                |
| 11            | Ane     | North  | 372                               | 61                                         | 1.7                 | 32             | Fujinoki | South  | 4                                 | 1805                                       | 20.8                |
| 12            | Yone    | North  | 15                                | 2047                                       | 34.5                | <b>Outflow</b> |          |        |                                   |                                            |                     |
| 13            | Amano   | North  | 111                               | 226                                        | 5.8                 | 33             | Seta     | South  | 3848                              | 323                                        | –                   |

2 <sup>#</sup> Category of location classified by Ohte et al. (2010).

3 <sup>\*</sup> Data source: Ohte et al. (2010).

4



1 Table 2 Estimated gross influx/efflux of total nitrate ( $\Delta N$ ) and atmospheric nitrate ( $\Delta A$ ) via  
 2 inflows/outflows during each observation interval, together with the average  $\delta^{15}N$ ,  $\delta^{18}O$ , and  
 3  $\Delta^{17}O$  values of total nitrate and remineralized portions of nitrate ( $\delta^{15}N_{re}$  and  $\delta^{18}O_{re}$ ) in the  
 4 inflows/outflows during each interval.

|                                | Spring<br>(n=1 to 2) | Summer<br>(n=2 to 3) | Autumn<br>(n=3 to 4) | Winter<br>(n=4 to 5) | Annual<br>(n=1 to 5) |
|--------------------------------|----------------------|----------------------|----------------------|----------------------|----------------------|
| Duration (days)                | 94                   | 49                   | 77                   | 145                  | 365                  |
| <b>Inflow</b>                  |                      |                      |                      |                      |                      |
| $\Delta N_{in}$ ( $10^6$ mol)  | $69 \pm 14$          | $3 \pm 1$            | $13 \pm 3$           | $114 \pm 23$         | $199 \pm 40$         |
| $\Delta A_{in}$ ( $10^6$ mol)  | $6.4 \pm 1.3$        | 0.1                  | $0.8 \pm 0.2$        | $2.8 \pm 0.6$        | $10.1 \pm 2.0$       |
| $10^3 \delta^{15}N$            | +4.0                 | +6.8                 | +5.6                 | +5.6                 | +5.1                 |
| $10^3 \delta^{18}O$            | +6.1                 | -0.8                 | +3.3                 | -1.5                 | +1.4                 |
| $10^3 \Delta^{17}O$            | +2.5                 | +0.8                 | +1.7                 | +0.6                 | +1.3                 |
| $10^3 \delta^{15}N_{re}$       | $+4.8 \pm 0.7$       | $+7.1 \pm 0.2$       | $+6.3 \pm 0.5$       | $+5.9 \pm 0.2$       | $+5.6 \pm 0.3$       |
| $10^3 \delta^{18}O_{re}$       | $-1.5 \pm 1.8$       | $-3.2 \pm 0.5$       | $-2.0 \pm 1.2$       | $-3.5 \pm 0.4$       | $-2.8 \pm 0.9$       |
| <b>Outflow</b>                 |                      |                      |                      |                      |                      |
| $\Delta N_{out}$ ( $10^6$ mol) | $24 \pm 5$           | $6 \pm 1$            | $5 \pm 1$            | $32 \pm 6$           | $67 \pm 13$          |
| $\Delta A_{out}$ ( $10^6$ mol) | $1.4 \pm 0.1$        | 0.1                  | 0.2                  | $0.4 \pm 0.1$        | $2.2 \pm 0.4$        |
| $10^3 \delta^{15}N$            | +7.3                 | +11.4                | +10.4                | +18.0                | +13.1                |
| $10^3 \delta^{18}O$            | +3.4                 | +4.8                 | +3.0                 | -0.7                 | +1.5                 |
| $10^3 \Delta^{17}O$            | +1.6                 | +0.4                 | +1.4                 | +0.4                 | +0.9                 |
| $10^3 \delta^{15}N_{re}$       | $+8.1 \pm 0.4$       | $+11.7 \pm 0.1$      | $+11.2 \pm 0.4$      | $+18.3 \pm 0.1$      | $+13.7 \pm 0.2$      |
| $10^3 \delta^{18}O_{re}$       | $-1.5 \pm 1.1$       | $+3.6 \pm 0.3$       | $-1.2 \pm 0.9$       | $-1.9 \pm 0.2$       | $-1.2 \pm 0.6$       |

5

6

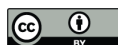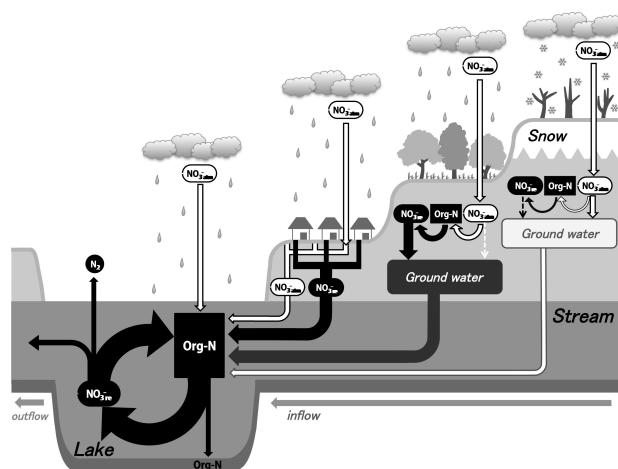

1  
 2 Figure 1. Schematic diagram showing the biological processing of atmospheric nitrate  
 3 ( $\text{NO}_3^-_{\text{atm}}$ ) and remineralized nitrate ( $\text{NO}_3^-_{\text{re}}$ ) in the watershed with catchments of varying land  
 4 uses and in the lake water column.  
 5  
 6

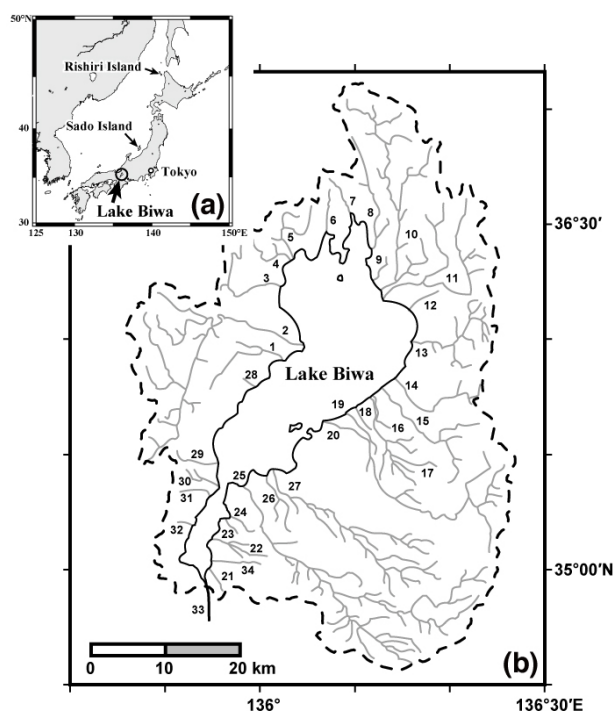

1  
 2 Figure 2. (a) Map showing the location of Lake Biwa watershed basin in Japan and Sado  
 3 Island, where the Sado-seki National Acid Rain Monitoring Station is located. (b) Map  
 4 showing the boundary of the Lake Biwa watershed basin (dashed line) and the locations of the  
 5 inflows (represented by numbers) and outflow (Seta River, No. 33) studied in this paper  
 6 (modified from Ohte et al. 2010).  
 7

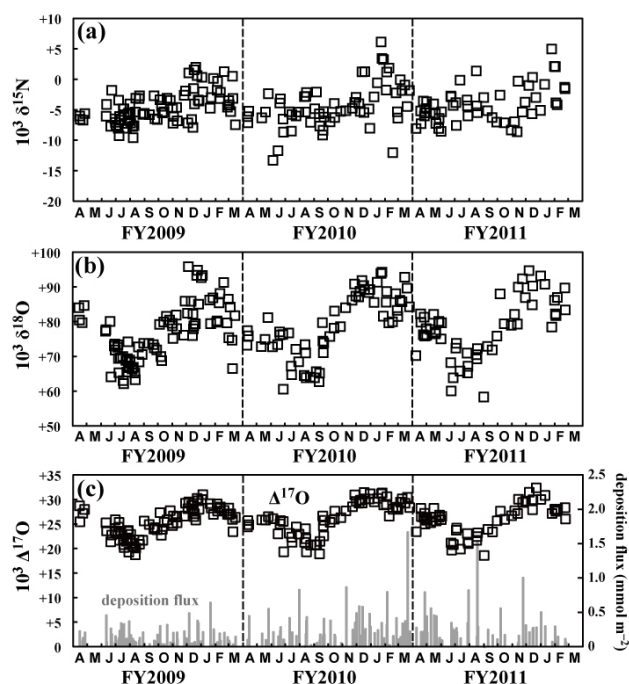

1  
 2 Figure 3. Temporal variations in the values of (a)  $\delta^{15}\text{N}$ , (b)  $\delta^{18}\text{O}$ , and (c)  $\Delta^{17}\text{O}$  of nitrate in wet  
 3 deposition recorded at the Sado-seki National Acid Rain Monitoring Station. Total deposition  
 4 flux of nitrate during each rain event was also presented (c).  
 5

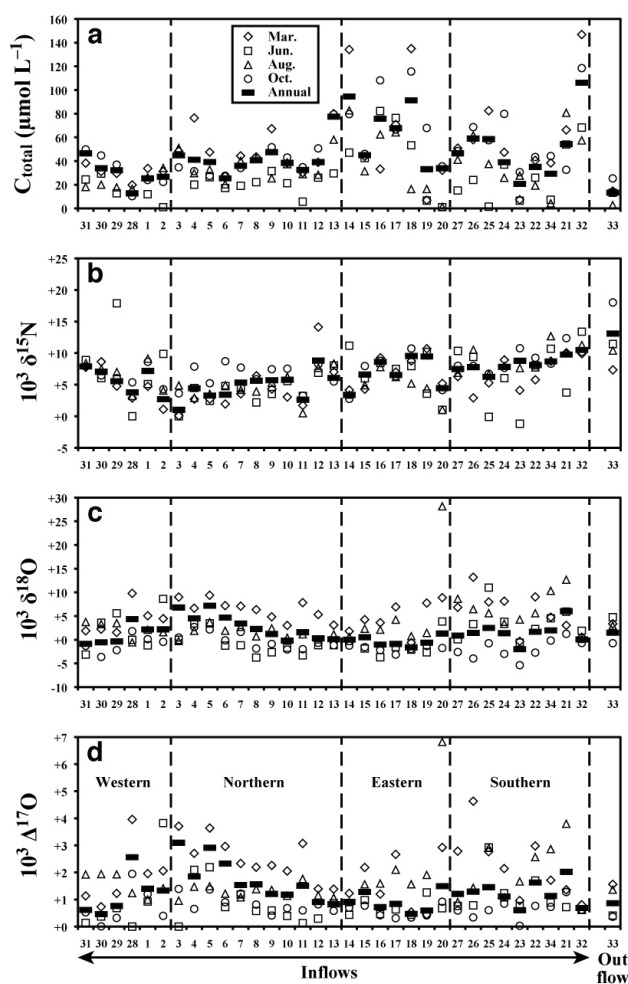

1  
2 Figure 4. Distribution of (a) total concentrations, (b)  $\delta^{15}\text{N}$ , (c)  $\delta^{18}\text{O}$ , and (d)  $\Delta^{17}\text{O}$  for nitrate in  
3 inflow streams showing various station numbers and the outflow at station No. 33 in Lake  
4 Biwa watershed in March (diamonds), June (squares), August (triangles), and October  
5 (circles) 2013 together with the annual averages for each river (black bars).

6

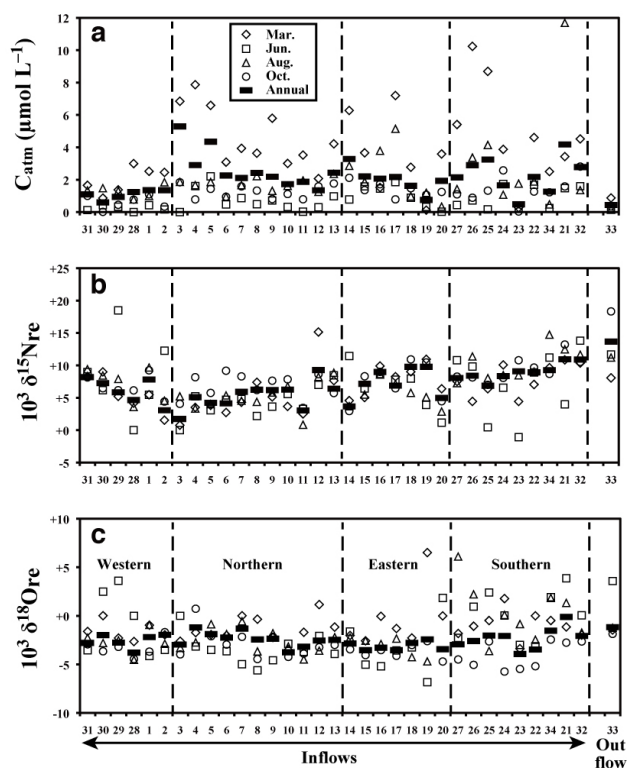

1  
 2 Figure 5. Distribution of concentrations of (a) atmospheric nitrate and (b)  $\delta^{15}\text{N}$  and (c)  $\delta^{18}\text{O}$   
 3 for remineralized nitrate ( $\delta^{15}\text{N}_{re}$  and  $\delta^{18}\text{O}_{re}$ , respectively) in inflow streams shown by various  
 4 station numbers and the outflow at station No. 33 of Lake Biwa watershed in March  
 5 (diamonds), June (squares), August (triangles), and October (circles) 2013 together with the  
 6 annual averages for each river (black bars).

7  
 8

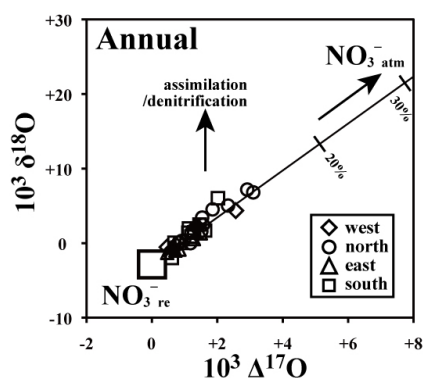

1  
 2 Figure 6. Relationship of the annual average values of  $\Delta^{17}\text{O}$  and  $\delta^{18}\text{O}$  of  $\text{NO}_3^-$  in the inflow  
 3 streams. The symbols represent the location of each river (west: diamonds; north: circles;  
 4 east: triangles; south: squares). A hypothetical mixing line between atmospheric nitrate  
 5 ( $\text{NO}_3^-_{\text{atm}}$ ) and remineralized nitrate ( $\text{NO}_3^-_{\text{re}}$ ) is shown together with the end member value of  
 6  $\text{NO}_3^-_{\text{re}}$  (large white square) and the 20% and 30% mixing ratios of  $\text{NO}_3^-_{\text{atm}}$  on the line.  
 7

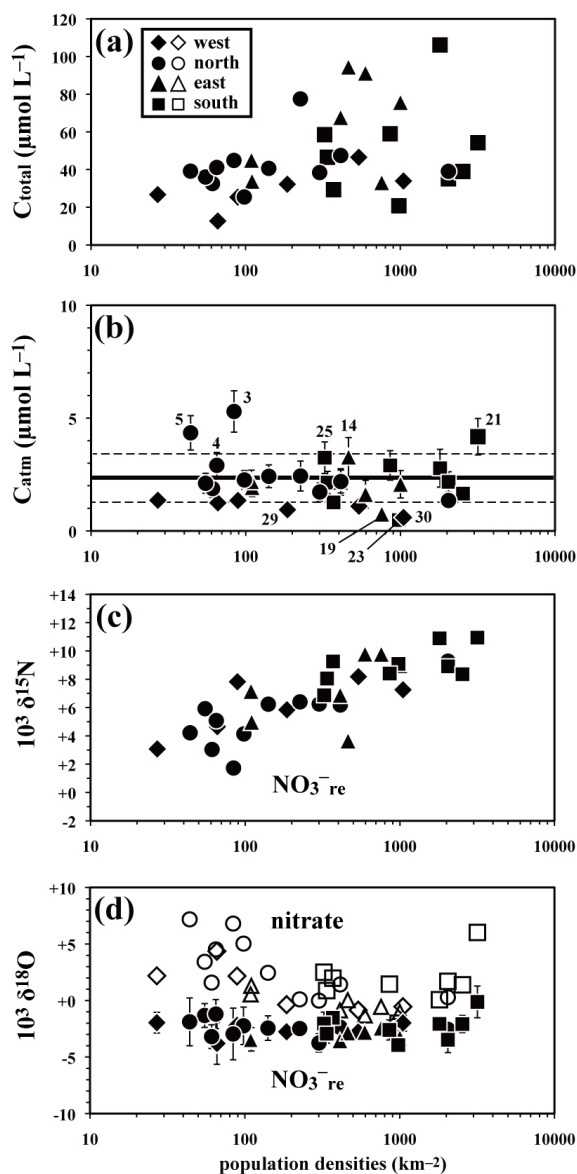

1  
 2 Figure 7. Annual average concentration of (a) nitrate ( $C_{total}$ ) and that of (b)  $NO_3^-$  atm ( $C_{atm}$ ) in  
 3 each inflow stream plotted as a function of the population density in each catchment, together  
 4 with (c) the annual average value of  $\delta^{15}N$  and (d) that of  $\delta^{18}O$  for remineralized  $NO_3^-$  ( $NO_3^-_{re}$ ).  
 5 (d) The annual average  $\delta^{18}O$  values of nitrate are also presented. The symbols represent the  
 6 location of each river (west: diamonds; north: circles; east: triangles; south: squares). The  
 7 uncertainties are presented only for those larger than the symbols.  
 8

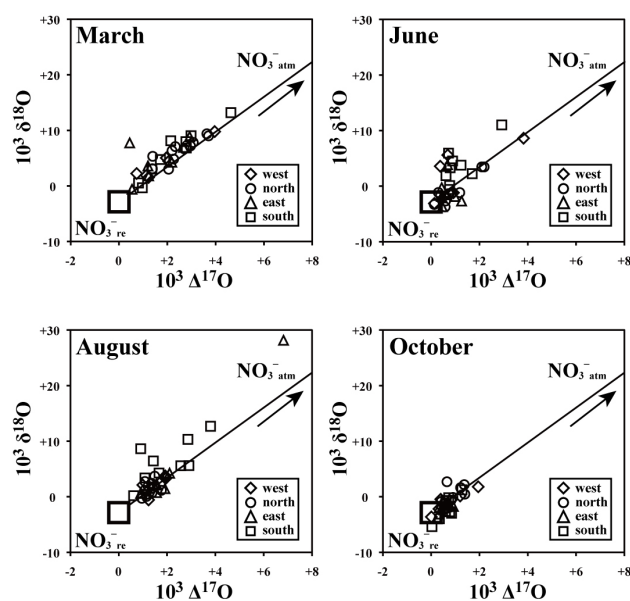

1  
 2 Figure 8. Temporal changes in the relationship between the values of  $\Delta^{17}\text{O}$  and  $\delta^{18}\text{O}$  of total  
 3 nitrate in the stream water. The symbols are the same as those in Figure 6. A hypothetical  
 4 mixing line between atmospheric nitrate ( $\text{NO}_3^-_{\text{atm}}$ ) and remineralized nitrate ( $\text{NO}_3^-_{\text{re}}$ ) is also  
 5 shown together with the end member value of  $\text{NO}_3^-_{\text{re}}$  (large white square).  
 6
